# Supplementary material for: Homogeneous and heterogeneous propagation of COVID-19 from super-spreading to super-isolation
Source: Research Square preprint supplement (doi:10.21203/rs.3.rs-276177/v1), 2021-03-11
Supplement: Supplementary file 1 [file 1aee3778cb451bf6f1a36974.xlsx]

## Sheet: output5
Area name	2020-03-01	2020-03-02	2020-03-03	2020-03-04	2020-03-05	2020-03-06	2020-03-07	2020-03-08	2020-03-09	2020-03-10	2020-03-11	2020-03-12	2020-03-13	2020-03-14	2020-03-15	2020-03-16	2020-03-17	2020-03-18	2020-03-19	2020-03-20	2020-03-21	2020-03-22	2020-03-23	2020-03-24	2020-03-25	2020-03-26	2020-03-27	2020-03-28	2020-03-29	2020-03-30	2020-03-31	2020-04-01	2020-04-02	2020-04-03	2020-04-04	2020-04-05	2020-04-06	2020-04-07	2020-04-08	2020-04-09	2020-04-10	2020-04-11	2020-04-12	2020-04-13	2020-04-14	2020-04-15	2020-04-16	2020-04-17	2020-04-18
Adur	0	0	0	0	0	0	0	0	0	0	0	0	0	0	0	0	0	0	0	0	0	0	0	0	0	0	0	0	0	1	0	0	0	1	0	1	0	0	0	0	0	1	0	0	1	1	0	0	1
Allerdale	0	0	0	0	0	0	0	0	0	0	0	0	0	0	0	0	0	0	0	0	0	0	1	0	0	2	0	2	1	0	2	0	2	2	1	0	3	1	4	1	2	0	0	2	3	2	3	1	1
Amber Valley	0	0	0	0	0	0	0	0	0	0	0	0	0	0	0	0	0	0	0	0	0	1	1	0	1	0	1	0	1	1	2	3	0	1	0	6	1	3	3	1	0	1	1	2	2	0	1	0	2
Arun	0	0	0	0	0	0	0	0	0	0	0	0	0	0	0	0	0	0	0	0	0	0	0	0	0	0	1	0	0	0	2	1	0	1	1	2	2	1	2	0	0	2	2	2	0	0	0	0	0
Ashfield	0	0	0	0	0	0	0	0	0	0	0	0	0	0	0	1	0	0	0	0	0	0	0	1	0	1	1	2	1	1	0	1	1	1	3	3	2	5	1	1	1	0	3	1	0	1	0	4	1
Ashford	0	0	0	0	0	0	0	0	0	0	1	0	0	0	0	0	1	0	0	0	0	0	1	1	0	0	0	0	1	0	0	1	1	1	3	1	1	1	0	1	1	0	0	3	0	1	1	0	0
Aylesbury Vale	0	0	1	0	0	0	0	0	0	0	0	0	0	0	0	0	0	0	0	1	0	0	1	0	0	0	1	0	2	1	0	2	1	0	0	2	1	2	3	2	2	4	1	1	0	2	0	4	2
Babergh	0	0	0	0	0	0	0	0	0	0	0	0	0	0	0	0	0	0	0	0	0	1	0	0	0	0	1	0	1	1	0	0	0	1	0	0	1	0	3	1	2	1	1	0	1	0	1	0	3
Barking and Dagenham	0	0	0	0	0	0	0	0	0	0	1	0	0	2	1	0	1	0	0	1	2	0	0	1	3	4	2	2	3	1	5	4	3	2	6	1	1	2	4	10	2	0	1	3	4	0	2	0	2
Barnet	0	0	0	0	0	0	0	0	0	0	1	0	0	0	0	0	0	0	0	5	4	2	1	4	10	6	6	9	11	14	8	10	10	8	10	11	13	23	7	15	9	10	12	6	6	8	7	4	6
Barnsley	0	0	0	0	0	0	0	0	0	0	0	0	0	0	0	0	0	0	0	0	0	0	0	0	0	1	0	1	2	3	2	4	2	4	3	4	3	6	6	9	3	3	5	3	3	5	1	4	1
Barrow-in-Furness	0	0	0	0	0	0	0	0	0	0	0	0	0	0	0	0	0	0	0	0	0	0	0	1	1	1	1	0	0	3	2	2	4	2	1	2	0	1	2	1	2	3	3	2	0	0	2	1	2
Basildon	0	0	0	0	0	0	0	0	0	0	0	0	0	0	1	0	0	0	0	0	0	0	0	1	0	1	2	0	4	1	8	7	1	6	6	4	3	4	3	1	6	4	2	7	8	2	4	1	3
Basingstoke and Deane	0	0	0	0	0	0	0	0	0	0	0	0	0	0	2	0	0	0	0	1	0	1	0	1	0	1	1	1	0	2	0	2	3	4	2	3	3	1	2	3	3	1	6	2	4	1	0	3	0
Bassetlaw	0	0	0	0	0	0	0	0	0	0	0	0	0	0	0	0	0	0	0	0	0	0	0	0	0	0	0	0	0	0	0	1	2	0	1	0	2	0	1	1	3	1	1	0	1	3	2	0	1
Bath and North East Somerset	0	0	0	0	0	0	0	0	0	0	0	0	0	0	0	0	0	0	0	0	2	0	1	3	0	0	1	1	0	1	1	2	2	0	2	2	2	5	0	0	1	2	0	3	0	0	0	0	1
Bedford	0	0	0	0	0	0	0	0	0	0	0	0	0	0	0	0	0	0	0	0	0	0	0	1	2	2	1	1	3	3	2	2	0	2	0	3	0	3	5	1	3	5	6	3	3	6	2	1	4
Bexley	0	0	0	0	0	0	0	0	0	0	1	0	0	2	0	2	1	1	1	1	1	0	1	2	1	3	1	1	4	2	4	5	3	6	9	3	5	3	9	4	0	4	8	2	4	3	5	2	4
Birmingham	0	0	0	0	0	0	0	0	0	0	0	1	0	1	0	1	2	4	3	3	3	10	8	4	12	12	17	19	22	24	25	26	28	17	37	28	32	20	36	30	27	26	25	16	24	25	15	25	16
Blaby	0	0	0	0	0	0	0	0	0	0	0	0	0	0	0	0	0	1	0	0	0	1	0	2	2	0	0	0	1	0	0	0	3	0	0	1	1	0	0	0	0	3	0	0	2	0	0	0	1
Blackburn with Darwen	0	0	0	0	0	0	0	0	0	0	0	0	0	0	0	0	0	0	0	0	0	0	0	0	0	0	0	1	0	1	0	3	2	2	1	0	1	4	1	1	0	2	4	0	1	1	1	2	1
Blackpool	0	0	0	0	0	0	0	0	0	0	0	0	0	0	0	0	0	0	0	0	0	0	0	0	0	0	0	0	1	1	1	1	4	0	1	1	0	2	1	3	4	3	3	2	4	1	4	2	4
Blaenau Gwent	0	0	0	0	0	0	0	0	0	0	0	0	0	0	0	0	0	0	0	0	0	0	0	0	0	0	0	0	0	0	0	0	0	0	0	0	0	0	0	0	0	0	0	0	0	0	0	0	0
Bolsover	0	0	0	0	0	0	0	0	0	0	0	0	0	0	0	0	0	0	0	0	0	0	0	1	0	2	0	0	0	0	0	0	1	0	0	2	0	0	0	1	1	1	0	1	1	1	0	2	0
Bolton	0	0	0	0	0	0	0	0	0	0	0	0	0	0	0	0	0	0	0	1	0	0	2	2	0	0	0	1	0	0	1	3	0	7	9	11	4	7	2	7	6	9	8	9	9	11	6	14	6
Boston	0	0	0	0	0	0	0	0	0	0	0	0	0	0	0	0	0	0	0	0	0	0	0	0	0	2	0	0	0	0	1	2	0	1	0	2	0	1	1	0	0	1	1	2	0	1	0	2	0
Bournemouth, Christchurch and Poole	0	0	0	0	0	0	0	0	0	0	0	0	0	0	0	0	0	0	0	0	0	0	0	0	0	1	1	2	1	1	2	0	0	3	2	4	2	5	3	1	5	4	1	2	0	4	2	4	4
Bracknell Forest	0	0	0	0	0	0	0	0	0	0	0	0	0	0	0	0	0	1	0	0	0	0	1	1	0	0	0	0	0	0	1	1	0	3	5	1	1	1	1	2	1	0	0	2	0	2	2	2	2
Bradford	0	0	0	0	0	0	0	0	0	0	0	0	0	0	0	0	0	1	0	0	0	0	0	0	0	3	4	4	3	4	7	4	3	2	7	3	3	5	15	5	13	7	10	6	5	7	12	7	5
Braintree	0	0	0	0	0	0	0	0	0	0	0	0	0	0	0	0	0	0	0	0	0	1	1	1	1	1	0	0	1	1	1	0	2	3	1	3	5	3	1	1	3	2	2	2	0	4	2	3	1
Breckland	0	0	0	0	0	0	0	0	0	0	0	0	0	0	0	0	0	0	0	0	0	0	0	0	2	1	0	0	0	1	0	2	1	1	0	1	0	0	0	1	0	1	3	1	2	2	0	1	1
Brent	0	0	0	0	0	0	0	0	0	0	0	0	1	0	0	1	0	1	3	4	5	5	4	11	5	3	7	7	7	10	6	18	18	13	24	13	14	16	20	9	7	8	12	12	14	5	10	3	4
Brentwood	0	0	0	0	0	0	0	0	0	0	0	0	0	0	0	0	1	0	0	0	0	0	0	0	0	1	2	1	1	1	1	1	4	1	0	2	0	1	2	6	1	2	3	2	1	4	1	1	3
Bridgend	0	0	0	0	0	0	0	0	0	0	0	0	0	0	0	0	0	0	0	0	0	0	0	0	0	0	0	0	0	0	0	0	0	0	0	0	0	0	0	0	0	0	0	0	0	0	0	0	0
Brighton and Hove	0	0	0	0	0	0	0	0	0	0	0	0	0	0	0	0	0	0	1	0	1	0	0	1	0	1	3	4	0	2	2	3	0	1	3	1	1	3	3	4	0	2	3	3	2	5	4	1	4
Bristol, City of	0	0	0	0	0	0	0	0	0	0	0	0	0	0	0	0	0	0	0	0	1	1	2	0	2	3	0	4	3	1	0	1	1	0	2	2	3	4	2	4	3	4	7	3	2	4	1	4	2
Broadland	0	0	0	0	0	0	0	0	0	0	0	0	0	0	0	0	0	0	0	0	0	0	0	0	0	0	0	1	0	0	2	2	1	2	0	1	0	0	2	1	0	1	2	1	0	2	1	2	1
Bromley	0	0	0	0	0	0	0	0	0	0	0	0	1	0	1	0	0	0	1	2	3	1	2	3	5	2	3	2	5	7	8	5	10	5	4	7	7	5	8	4	4	6	6	3	5	8	5	5	6
Bromsgrove	0	0	0	0	0	0	0	0	0	0	0	0	0	0	0	0	0	0	0	2	1	1	0	0	1	4	1	1	1	3	2	4	4	1	3	3	1	2	1	3	2	4	2	3	3	2	2	1	4
Broxbourne	0	0	0	0	0	0	0	0	0	0	0	0	0	0	0	0	0	0	0	0	0	0	1	1	2	0	2	2	3	1	2	3	2	3	1	1	1	2	1	2	0	4	0	1	0	2	1	1	1
Broxtowe	0	0	0	0	0	0	0	0	0	0	0	1	0	0	0	0	0	1	0	0	0	0	0	0	2	0	3	0	0	0	0	1	0	1	2	1	2	2	0	3	2	3	1	1	2	2	0	1	1
Burnley	0	0	0	0	0	0	0	0	0	0	0	0	0	0	0	0	0	0	0	0	0	0	0	1	0	0	0	0	1	0	0	0	3	0	1	3	0	3	4	1	1	2	0	0	0	0	2	2	3
Bury	0	0	0	0	0	0	0	0	0	0	0	0	0	1	0	0	0	0	0	0	3	0	1	0	0	3	1	0	2	7	0	0	4	3	2	4	1	6	5	2	3	12	3	7	1	6	6	4	4
Caerphilly	0	0	0	0	0	0	0	0	0	0	0	0	0	0	0	0	0	0	0	0	0	0	0	0	0	0	0	0	0	0	0	0	0	0	0	0	0	0	0	0	0	0	0	0	0	0	0	0	0
Calderdale	0	0	0	0	0	0	0	0	0	0	0	0	0	0	0	0	0	0	0	0	0	0	0	0	0	0	0	0	3	2	1	4	4	2	3	1	3	4	3	4	2	4	2	1	3	3	2	1	3
Cambridge	0	0	0	0	0	0	0	0	0	0	0	0	0	0	0	0	0	0	0	0	1	0	0	0	0	0	0	0	0	0	0	0	2	2	0	0	1	2	0	0	2	1	2	1	0	1	2	3	2
Camden	0	0	0	0	0	0	0	0	0	0	0	0	0	1	1	0	0	0	1	1	1	0	1	2	1	1	3	2	1	5	6	7	8	2	7	3	5	6	4	4	6	7	4	3	1	0	5	2	5
Cannock Chase	0	0	0	0	0	0	0	0	0	0	0	0	0	0	0	0	0	0	0	1	0	1	0	1	0	0	0	1	0	0	2	3	2	2	2	3	4	3	1	3	0	1	1	0	1	0	1	1	3
Canterbury	0	0	0	0	0	0	0	0	0	0	0	0	0	0	0	0	0	0	0	0	0	1	0	0	0	1	1	0	0	2	0	1	2	0	2	0	5	4	4	2	4	0	5	0	4	4	0	1	1
Cardiff	0	0	0	0	0	0	0	0	0	0	0	0	0	0	0	0	0	0	0	0	0	0	0	0	0	0	0	0	0	0	0	0	0	0	0	0	0	0	0	0	0	0	0	0	0	0	0	0	0
Carlisle	0	0	0	0	0	0	0	0	0	0	0	0	0	0	0	0	0	0	2	1	0	0	0	1	1	1	1	2	0	1	1	2	1	2	0	1	1	4	2	2	3	1	1	1	2	1	3	0	1
Carmarthenshire	0	0	0	0	0	0	0	0	0	0	0	0	0	0	0	0	0	0	0	0	0	0	0	0	0	0	0	0	0	0	0	0	0	0	0	0	0	0	0	0	0	0	0	0	0	0	0	0	0
Castle Point	0	0	0	0	0	0	0	0	0	0	0	0	0	0	0	1	0	0	0	0	0	0	0	0	0	0	0	0	0	1	1	0	2	0	0	0	1	5	4	2	0	2	2	1	1	1	2	0	3
Central Bedfordshire	0	0	0	0	0	0	0	0	0	0	0	0	0	0	0	0	0	0	1	0	0	1	0	2	1	3	5	0	1	0	2	4	2	5	1	7	6	4	5	7	1	2	3	1	4	4	5	6	1
Ceredigion	0	0	0	0	0	0	0	0	0	0	0	0	0	0	0	0	0	0	0	0	0	0	0	0	0	0	0	0	0	0	0	0	0	0	0	0	0	0	0	0	0	0	0	0	0	0	0	0	0
Charnwood	0	0	0	0	0	0	0	0	0	0	0	0	0	0	0	0	0	0	0	0	0	0	0	1	0	0	0	1	1	2	0	2	2	1	0	1	0	3	0	1	2	2	1	1	0	2	1	4	0
Chelmsford	0	1	0	0	0	0	0	0	0	0	0	0	1	0	0	0	0	0	0	0	0	1	1	1	0	4	1	1	3	2	3	2	2	1	2	7	4	2	4	3	3	3	2	2	4	4	0	2	0
Cheltenham	0	0	0	0	0	0	0	0	0	0	0	0	0	0	0	0	0	0	0	1	0	0	0	0	0	0	0	2	0	1	2	0	3	1	1	1	0	1	3	2	5	4	2	3	6	2	2	2	2
Cherwell	0	0	0	0	0	0	0	0	0	0	0	0	0	0	0	0	0	0	0	0	0	0	0	0	2	0	1	0	0	2	0	0	1	0	3	1	1	2	4	2	1	2	1	3	1	3	2	2	0
Cheshire East	0	0	0	0	0	0	0	0	0	0	0	0	0	0	2	0	1	0	0	1	0	3	1	0	1	0	1	6	2	2	1	5	3	8	3	5	8	5	6	6	7	9	7	11	6	5	6	1	10
Cheshire West and Chester	0	0	0	0	0	0	0	0	0	0	0	0	1	0	0	0	1	0	0	0	0	0	0	0	0	2	2	0	3	4	0	7	3	3	2	7	7	8	6	7	5	8	6	3	8	4	7	5	8
Chesterfield	0	0	0	0	0	0	0	0	0	0	0	0	0	0	0	0	0	0	0	0	0	0	0	0	1	0	0	0	2	0	0	1	0	0	1	2	1	1	0	2	0	0	1	3	2	2	0	2	2
Chichester	0	0	0	0	0	0	0	0	0	0	0	0	0	0	0	0	1	0	0	0	0	0	0	0	1	0	1	0	0	1	1	0	1	0	1	2	2	1	2	0	2	1	0	0	0	0	2	1	1
Chiltern	0	0	0	0	0	0	0	1	0	1	0	0	0	0	1	0	0	0	0	0	0	3	2	0	2	1	1	1	4	1	1	1	4	1	0	2	0	0	0	3	0	0	0	2	2	2	3	1	1
Chorley	0	0	0	0	0	0	0	0	0	0	0	0	0	0	0	0	0	0	0	0	0	0	1	0	0	0	0	0	0	0	1	0	0	1	2	2	0	0	3	2	2	2	3	1	3	3	4	2	2
Colchester	0	0	0	0	0	0	0	0	0	0	0	0	0	0	0	0	0	1	0	0	1	0	0	0	0	2	0	0	1	1	0	3	2	1	2	2	0	3	2	2	2	3	2	2	0	2	1	7	3
Conwy	0	0	0	0	0	0	0	0	0	0	0	0	0	0	0	0	0	0	0	0	0	0	0	0	0	0	0	0	0	0	0	0	0	0	0	0	0	0	0	0	0	0	0	0	0	0	0	0	0
Copeland	0	0	0	0	0	0	0	0	0	0	0	0	0	0	0	0	0	0	0	0	1	0	0	0	2	0	0	1	0	2	0	1	2	1	1	1	0	4	0	0	1	3	0	1	2	0	3	2	0
Corby	0	0	0	0	0	0	0	0	0	0	0	0	0	0	0	0	0	0	0	0	0	0	0	0	0	0	0	0	0	0	0	0	2	1	0	2	1	1	0	1	0	0	1	1	2	1	2	1	0
Cornwall and Isles of Scilly	0	0	0	0	0	0	0	0	0	0	0	0	0	0	0	0	1	2	1	0	3	1	0	1	0	0	2	1	3	4	4	1	6	4	3	2	3	1	3	6	6	3	1	1	1	9	6	6	3
Cotswold	0	0	0	0	0	0	0	0	1	0	0	0	0	0	0	0	0	0	0	0	0	0	0	0	0	0	0	1	3	0	0	2	0	1	0	0	2	2	1	1	1	2	2	1	1	1	2	3	0
County Durham	0	0	0	0	0	0	0	0	0	0	0	0	0	0	0	0	0	0	0	2	0	1	2	0	0	0	4	2	2	5	6	6	7	11	7	5	12	12	11	9	12	9	8	5	9	3	4	4	11
Coventry	0	0	0	0	0	0	0	0	0	0	0	0	0	0	0	0	0	1	0	0	0	2	3	3	0	3	1	3	6	10	2	8	7	5	3	8	4	4	7	6	5	5	6	3	6	8	8	4	6
Craven	0	0	0	0	0	0	0	0	0	0	0	0	0	0	0	0	0	0	0	0	0	0	0	0	1	1	1	0	0	0	0	0	1	0	2	0	4	0	0	1	1	2	2	0	0	1	1	0	0
Crawley	0	0	0	0	0	0	0	0	0	0	0	0	0	0	0	0	0	0	0	0	0	0	0	0	1	1	2	1	1	2	0	2	2	3	2	3	0	0	2	2	0	0	1	1	3	2	3	0	1
Croydon	0	0	0	0	0	0	0	0	0	0	0	0	0	0	2	0	5	1	0	3	3	3	3	8	4	9	9	6	12	9	2	7	7	16	13	13	9	15	11	8	15	10	8	8	6	8	10	7	9
Dacorum	0	0	0	0	0	0	0	0	0	0	0	0	0	0	0	0	0	0	0	0	1	1	1	3	2	0	0	0	2	0	1	2	2	4	7	2	0	3	1	2	2	1	2	3	1	0	1	6	1
Darlington	0	0	0	0	0	0	0	0	0	0	0	0	0	0	0	0	0	0	0	0	0	0	0	0	0	0	0	0	1	3	0	0	0	1	2	1	1	1	1	1	1	1	3	1	3	1	1	0	2
Dartford	0	0	0	0	0	0	0	0	0	0	0	0	0	0	0	0	0	0	0	0	1	1	0	0	2	1	1	0	0	3	1	0	0	2	1	1	2	4	1	4	2	4	5	2	1	2	3	3	0
Daventry	0	0	0	0	0	0	0	0	0	0	0	0	0	0	0	0	0	0	0	0	0	0	0	0	0	2	1	2	1	0	1	0	0	3	1	2	2	0	1	0	2	2	0	1	0	1	0	1	0
Denbighshire	0	0	0	0	0	0	0	0	0	0	0	0	0	0	0	0	0	0	0	0	0	0	0	0	0	0	0	0	0	0	0	0	0	0	0	0	0	0	0	0	0	0	0	0	0	0	0	0	0
Derby	0	0	0	0	0	0	0	0	0	0	0	0	0	0	0	0	0	0	0	2	0	1	2	1	0	2	2	3	4	1	4	5	4	7	5	8	5	5	9	7	6	14	5	2	4	6	1	4	8
Derbyshire Dales	0	0	0	0	0	0	0	0	0	0	0	0	0	0	0	0	0	0	0	0	0	0	0	1	0	0	0	1	1	2	1	1	0	0	0	1	2	0	1	3	1	0	0	1	1	1	1	0	2
Doncaster	0	0	0	0	0	0	0	0	0	0	0	0	0	0	0	0	0	0	0	0	0	0	1	0	0	0	0	1	0	1	0	2	2	2	9	3	3	0	3	1	1	5	4	2	3	3	4	2	1
Dorset	0	0	0	0	0	0	0	0	0	0	0	0	0	0	0	0	0	0	0	0	1	0	1	0	3	2	3	0	0	2	0	2	4	4	4	0	6	1	3	0	4	1	2	3	1	1	3	2	3
Dover	0	0	0	0	0	0	0	0	0	0	0	0	0	0	0	0	0	0	0	0	0	0	1	0	0	0	1	0	1	0	1	0	1	1	1	2	1	3	6	0	1	1	2	0	1	2	2	1	0
Dudley	0	0	0	0	0	0	0	0	0	1	0	0	2	0	0	2	1	0	0	0	1	0	1	2	2	6	3	3	6	5	6	8	15	6	4	7	10	10	4	3	4	4	7	5	5	5	5	7	7
Ealing	0	0	0	0	0	0	0	0	0	0	1	1	0	0	1	0	0	1	1	2	1	3	4	5	6	4	5	5	5	6	6	6	7	12	4	9	9	8	4	11	4	11	10	7	3	7	10	5	4
East Cambridgeshire	0	0	0	0	0	0	0	0	0	0	0	0	0	0	0	0	0	0	0	0	0	0	0	0	0	0	0	0	0	0	0	0	0	2	1	0	1	1	1	1	1	1	1	0	2	0	1	3	0
East Devon	0	0	0	0	0	0	0	0	0	0	0	0	0	0	0	0	0	0	0	0	0	0	0	0	1	0	0	0	1	0	0	2	0	1	1	0	0	2	2	0	1	0	0	1	0	0	0	0	0
East Hampshire	0	0	0	0	0	0	0	0	0	0	0	0	0	0	0	1	0	0	0	0	0	0	0	0	2	1	1	0	1	0	2	2	0	1	0	2	1	1	3	2	3	1	2	2	1	2	2	1	0
East Hertfordshire	0	0	0	0	0	0	0	0	0	0	0	0	0	0	0	0	0	0	1	0	0	0	1	0	0	0	0	1	2	3	2	0	1	0	2	1	1	2	2	3	1	1	2	3	1	1	2	2	3
East Lindsey	0	0	0	0	0	0	0	0	0	0	0	0	0	0	0	0	0	0	0	0	0	0	0	0	0	0	2	1	1	1	0	0	2	1	0	1	0	0	1	1	3	3	0	0	0	3	0	0	2
East Northamptonshire	0	0	0	0	0	0	0	0	0	0	0	0	0	0	0	0	0	0	0	0	0	0	0	0	0	0	0	1	0	1	2	0	2	4	3	0	1	1	0	2	0	2	0	1	3	5	0	0	0
East Riding of Yorkshire	0	0	0	0	0	0	0	0	0	0	0	0	0	0	0	0	0	0	1	0	0	0	0	1	1	0	0	1	0	1	2	2	0	1	3	4	3	3	5	2	1	2	2	4	5	1	4	4	5
East Staffordshire	0	0	0	0	0	0	0	0	0	0	0	0	0	0	0	0	0	0	0	0	0	0	0	0	0	1	0	3	1	0	3	2	1	1	0	3	4	4	6	5	2	3	2	3	1	4	3	5	4
East Suffolk	0	0	0	0	0	0	0	0	0	0	0	0	0	0	0	0	0	0	0	1	0	0	0	1	2	2	1	3	2	1	3	0	5	2	4	4	0	2	5	4	2	5	4	6	0	2	2	6	3
Eastbourne	0	0	0	0	0	0	0	0	0	0	0	0	0	0	0	0	0	0	0	1	0	0	1	1	1	0	0	1	0	2	0	0	0	1	0	0	0	1	1	1	3	1	0	2	2	0	0	1	0
Eastleigh	0	0	0	0	0	0	0	0	0	0	0	0	0	0	0	0	0	0	0	0	0	0	0	0	0	2	1	3	0	1	2	1	0	0	0	0	0	1	0	3	1	3	1	0	3	1	1	2	1
Eden	0	0	0	0	0	0	0	0	0	0	0	0	0	0	0	0	0	0	0	0	0	0	1	1	1	0	0	0	1	0	0	0	2	2	1	1	0	1	0	1	1	0	1	2	0	0	0	0	1
Elmbridge	0	0	0	0	0	0	0	0	0	0	0	0	0	0	0	0	0	0	0	2	0	0	0	2	0	1	0	2	1	1	2	4	4	0	3	1	1	2	1	3	3	1	1	1	3	0	2	6	0
Enfield	0	0	0	0	0	0	0	0	0	0	0	0	1	0	0	1	2	0	0	1	2	1	2	3	4	3	4	2	3	5	8	8	8	5	8	4	12	8	8	6	8	10	6	10	7	8	5	7	7
Epping Forest	0	0	0	0	0	0	0	0	0	0	0	0	0	0	0	0	0	1	0	1	0	0	1	0	1	1	4	2	1	3	3	4	4	5	4	3	5	8	5	9	4	5	5	3	4	8	2	6	2
Epsom and Ewell	0	0	0	0	0	0	0	0	0	0	0	0	0	1	0	0	0	0	0	0	0	0	2	2	0	0	0	0	0	0	1	6	1	2	6	3	0	1	6	2	2	1	2	1	0	2	2	1	1
Erewash	0	0	0	0	0	0	0	0	0	0	0	0	0	0	0	0	0	0	0	0	0	1	1	0	0	0	0	0	1	2	2	4	2	1	3	1	1	0	4	2	1	2	2	1	2	0	0	1	1
Exeter	0	0	0	0	0	0	0	0	0	0	0	0	0	0	1	0	0	0	0	0	0	1	1	0	0	1	0	2	0	0	1	0	0	0	1	1	2	1	0	0	1	1	0	1	1	1	0	0	1
Fareham	0	0	0	0	0	0	0	0	0	0	0	0	0	1	0	0	0	1	0	0	1	1	2	2	0	1	1	4	0	2	3	2	1	1	0	1	0	0	4	2	1	2	2	2	1	1	3	1	0
Fenland	0	0	0	0	0	0	0	0	0	0	0	0	0	0	0	0	0	0	0	0	0	0	0	0	0	1	0	0	0	1	1	0	0	1	0	2	2	0	2	1	1	1	1	1	3	1	0	2	1
Flintshire	0	0	0	0	0	0	0	0	0	0	0	0	0	0	0	0	0	0	0	0	0	0	0	0	0	0	0	0	0	0	0	0	0	0	0	0	0	0	0	0	0	0	0	0	0	0	0	0	0
Folkestone and Hythe	0	0	0	0	0	0	0	0	0	0	0	0	0	0	0	0	0	0	0	0	0	0	0	0	0	0	0	2	0	1	0	0	1	1	1	0	3	2	1	1	2	0	2	2	4	1	0	3	1
Forest of Dean	0	0	0	0	0	0	0	0	0	0	0	0	0	0	0	0	0	0	0	0	0	0	0	0	0	1	0	2	0	1	1	0	0	1	1	0	2	1	4	1	1	2	1	1	0	0	0	2	1
Fylde	0	0	0	0	0	0	0	0	0	0	0	0	0	0	0	0	0	0	0	0	0	0	0	0	0	0	1	0	1	1	0	1	1	1	1	2	0	3	0	2	0	0	2	3	1	2	2	0	1
Gateshead	0	0	0	0	0	0	0	0	0	0	0	0	0	0	0	0	0	0	0	0	0	0	1	0	0	0	1	1	1	5	0	2	2	2	4	3	2	6	8	8	5	3	6	4	5	3	4	3	4
Gedling	0	0	1	0	0	0	0	0	0	0	0	0	0	0	0	0	0	1	0	0	0	1	0	1	0	0	0	1	0	0	1	2	0	1	0	0	0	1	3	1	3	0	1	2	0	1	2	3	2
Gloucester	0	0	0	0	0	0	0	0	0	0	0	0	0	0	0	0	0	0	1	0	0	0	0	0	0	0	0	1	1	1	3	2	1	2	2	4	1	0	3	1	0	3	2	3	4	1	0	3	2
Gosport	0	0	0	0	0	0	0	0	0	0	0	0	0	0	0	0	0	0	0	0	1	1	2	0	1	1	0	0	0	1	2	0	0	1	0	1	0	3	1	4	0	2	2	1	0	1	0	2	3
Gravesham	0	0	0	0	0	0	0	0	0	0	0	0	0	0	0	0	0	0	0	0	0	0	0	0	0	0	0	1	1	3	1	0	3	3	1	6	4	1	2	2	3	1	3	3	1	0	2	1	0
Great Yarmouth	0	0	0	0	0	0	0	0	0	0	0	0	0	0	0	0	0	0	0	0	0	0	0	0	0	0	0	0	0	1	0	0	0	0	3	2	1	0	4	1	1	0	1	1	1	1	3	2	0
Greenwich	0	0	0	0	0	0	0	0	0	0	0	0	0	1	0	1	1	0	0	0	1	2	3	5	2	4	4	3	3	4	4	6	9	4	8	3	6	5	9	7	3	0	6	5	10	6	4	3	2
Guildford	0	0	0	0	0	0	0	0	0	0	0	0	0	0	0	0	0	0	0	0	0	0	0	0	1	0	0	0	0	0	1	1	0	0	1	0	0	5	2	3	0	2	1	1	1	2	0	2	3
Gwynedd	0	0	0	0	0	0	0	0	0	0	0	0	0	0	0	0	0	0	0	0	0	0	0	0	0	0	0	0	0	0	0	0	0	0	0	0	0	0	0	0	0	0	0	0	0	0	0	0	0
Hackney and City of London	0	0	0	0	0	0	0	0	0	0	0	0	0	0	0	1	1	2	0	0	0	0	2	3	5	3	4	4	5	2	4	7	6	4	10	2	2	9	8	10	2	3	5	3	6	6	3	2	6
Halton	0	0	0	0	0	0	0	0	0	0	0	0	0	0	0	0	0	0	1	0	0	1	0	0	0	0	1	2	0	0	0	0	2	2	3	2	2	1	2	1	2	2	4	5	3	0	5	3	3
Hambleton	0	0	0	0	0	0	0	0	0	0	0	0	0	0	0	0	0	1	0	0	0	0	0	0	0	0	0	1	0	0	0	2	2	1	0	1	0	5	1	1	3	1	1	2	0	2	3	0	1
Hammersmith and Fulham	0	0	0	0	0	0	0	0	0	1	0	0	0	0	0	0	0	0	0	1	1	2	1	3	2	0	2	3	2	3	4	4	0	5	7	6	3	3	5	1	3	4	0	2	2	2	3	4	3
Harborough	0	0	0	0	0	0	0	0	0	0	0	0	0	1	0	0	0	0	0	0	0	0	1	0	0	0	1	0	0	0	1	0	0	0	0	0	1	0	1	2	1	1	0	1	0	0	1	0	2
Haringey	0	0	0	0	0	0	0	0	0	0	0	0	0	0	0	0	0	4	0	0	1	1	1	2	6	7	3	4	4	1	6	7	6	8	13	6	11	3	8	8	4	4	0	5	5	1	6	5	0
Harlow	0	0	0	0	0	0	0	0	0	0	0	0	0	0	0	0	0	0	0	0	0	0	1	0	0	1	1	2	1	1	1	4	3	4	0	2	4	4	5	1	2	7	1	0	1	2	2	1	2
Harrogate	0	0	0	0	0	0	0	0	0	0	0	0	0	0	0	1	0	0	0	0	0	0	1	0	0	0	0	1	1	1	1	0	1	2	2	2	3	2	3	0	2	1	1	1	0	2	2	0	3
Harrow	0	0	0	0	0	0	0	0	0	0	0	0	1	1	2	1	1	2	3	2	0	1	5	4	6	7	8	8	10	10	11	7	11	10	4	12	5	11	7	8	12	10	7	6	3	7	7	4	3
Hart	0	0	0	0	0	0	0	0	0	0	0	0	0	0	0	0	0	0	0	0	0	1	0	1	0	0	0	0	1	0	1	1	1	3	2	2	2	0	2	2	1	1	2	1	0	1	0	2	0
Hartlepool	0	0	0	0	0	0	0	0	0	0	0	0	0	0	0	0	0	0	0	1	1	0	0	0	0	0	0	0	0	3	0	0	1	0	0	0	0	2	2	1	2	1	1	1	4	1	1	1	1
Hastings	0	0	0	0	0	0	0	0	0	0	0	0	0	0	0	0	0	0	0	0	0	0	0	0	0	1	0	0	0	0	0	0	0	1	0	1	0	0	0	0	0	1	1	0	0	0	0	0	0
Havant	0	0	0	0	0	0	0	0	0	0	0	0	0	0	0	0	0	1	0	1	0	0	0	2	2	2	0	0	1	0	1	1	2	0	1	1	3	1	0	4	2	3	2	1	2	2	1	2	3
Havering	0	0	0	0	0	0	0	0	0	0	0	0	0	0	0	0	0	1	0	2	0	1	2	1	4	1	1	1	6	5	4	9	6	6	5	6	10	10	7	4	3	4	10	8	2	7	5	5	8
Herefordshire, County of	0	0	0	0	0	0	0	0	0	0	0	0	0	0	0	0	0	1	0	0	0	0	0	0	0	0	0	1	0	1	3	1	2	1	0	0	1	3	0	1	0	4	2	2	0	1	1	0	1
Hertsmere	0	0	0	0	0	0	0	0	1	0	0	0	0	0	0	0	0	0	0	0	2	2	2	2	0	3	2	0	3	2	3	4	2	3	6	6	5	5	5	2	3	5	2	3	3	2	8	1	0
High Peak	0	0	0	0	0	0	0	0	0	0	0	0	0	0	0	0	0	0	0	1	0	0	0	0	0	0	0	0	0	0	0	0	1	1	3	1	1	4	1	0	2	1	1	4	3	2	1	2	4
Hillingdon	0	0	0	0	0	0	0	0	0	0	0	0	0	0	0	0	0	2	0	1	2	1	1	3	3	3	4	10	10	5	4	8	9	6	5	7	7	3	11	7	6	5	6	10	6	6	3	5	2
Hinckley and Bosworth	0	0	0	0	0	0	0	0	0	0	0	0	0	0	0	1	0	0	0	0	0	0	1	0	0	0	0	1	1	0	1	1	1	1	1	2	2	1	1	1	1	1	0	3	0	1	1	2	1
Horsham	0	0	0	0	0	0	0	0	0	0	0	0	0	0	0	0	0	0	1	1	0	4	1	1	0	0	0	1	2	1	1	1	0	2	0	3	0	2	4	1	2	1	1	2	2	2	0	3	0
Hounslow	0	0	0	0	0	0	0	0	1	0	0	1	0	0	0	0	0	1	2	2	2	3	1	2	4	6	2	4	4	3	6	3	8	2	8	7	4	2	6	8	4	7	4	8	8	3	2	4	2
Huntingdonshire	0	0	0	0	0	0	0	0	0	0	0	0	0	0	0	0	0	0	0	0	1	2	0	0	1	0	1	1	0	0	3	1	0	1	2	0	1	2	1	3	1	1	0	1	0	0	4	0	2
Hyndburn	0	0	0	0	0	0	0	0	0	0	0	0	0	0	0	0	0	1	0	1	0	0	0	0	0	0	0	1	0	0	1	0	0	0	1	0	0	1	1	0	0	2	3	1	1	1	1	1	1
Ipswich	0	0	0	0	0	0	0	0	0	0	0	0	0	0	0	0	0	0	0	0	0	0	0	1	0	1	0	2	0	1	3	0	0	3	0	0	2	4	3	4	3	2	3	4	1	1	1	0	1
Isle of Anglesey	0	0	0	0	0	0	0	0	0	0	0	0	0	0	0	0	0	0	0	0	0	0	0	0	0	0	0	0	0	0	0	0	0	0	0	0	0	0	0	0	0	0	0	0	0	0	0	0	0
Isle of Wight	0	0	0	0	0	0	0	0	0	0	0	0	0	0	0	0	0	0	0	0	0	1	0	0	1	0	0	0	0	0	0	1	0	1	0	1	1	1	1	2	0	1	2	0	3	1	0	2	0
Islington	0	0	0	0	0	0	0	0	0	0	0	0	0	0	0	0	0	0	2	1	3	0	1	0	0	3	5	1	3	3	6	3	3	4	6	7	3	4	5	3	3	3	2	4	2	2	2	0	1
Kensington and Chelsea	0	0	0	0	0	0	0	0	0	0	0	0	0	1	0	0	0	0	2	0	0	0	1	1	2	3	5	2	1	1	4	4	1	4	5	1	1	2	8	6	0	2	0	1	2	1	3	0	1
Kettering	0	0	0	0	0	0	0	0	0	0	0	0	0	0	0	1	0	0	0	0	0	0	0	0	0	2	0	0	0	2	2	1	0	1	1	1	2	0	0	1	0	5	1	1	0	0	0	2	2
King's Lynn and West Norfolk	0	0	0	0	0	0	0	0	0	0	0	0	0	0	0	0	1	1	0	0	0	0	0	0	0	1	1	1	2	2	1	1	2	1	1	1	0	6	2	2	3	2	2	4	0	0	6	4	2
Kingston upon Hull, City of	0	0	0	0	0	0	0	0	0	0	0	0	0	0	0	0	0	0	0	0	0	0	0	0	0	0	1	1	1	0	0	3	1	1	0	2	3	1	2	1	1	0	0	1	1	2	2	4	3
Kingston upon Thames	0	0	0	0	0	0	0	0	0	0	0	0	0	0	0	0	0	0	0	1	1	0	1	0	1	1	2	0	0	3	0	1	3	4	4	1	2	2	4	3	3	2	2	7	3	5	5	2	1
Kirklees	0	0	0	0	0	0	0	0	0	0	0	0	0	0	0	1	0	0	0	0	0	0	2	0	0	1	1	3	4	5	5	2	8	5	6	5	6	1	6	9	8	7	3	4	3	7	7	5	7
Knowsley	0	0	0	0	0	0	0	0	0	0	0	0	0	0	0	0	0	0	0	0	0	0	0	0	1	1	0	0	0	3	2	1	2	2	0	1	1	3	4	2	2	5	6	5	6	2	8	1	0
Lambeth	0	0	0	0	0	0	0	0	0	0	0	0	0	0	0	1	1	2	0	3	2	4	6	0	6	5	7	7	6	8	11	6	7	9	5	6	6	9	9	6	5	6	8	8	5	6	4	3	2
Lancaster	0	0	0	0	0	0	0	0	0	0	0	0	0	0	0	0	0	0	0	0	0	0	0	0	1	0	3	0	1	1	0	0	3	3	1	3	1	1	3	1	1	2	1	1	2	4	1	0	2
Leeds	0	0	0	0	0	0	0	0	0	0	0	0	0	0	0	0	1	0	0	0	1	1	2	1	1	2	5	4	4	8	3	3	7	5	10	5	9	9	7	13	10	9	8	13	10	15	16	13	13
Leicester	0	0	0	0	0	0	0	0	0	0	0	0	0	0	0	0	0	0	0	0	1	3	0	1	0	1	1	3	3	2	2	3	4	6	6	3	9	5	6	4	4	3	7	4	4	3	2	3	2
Lewes	0	0	0	0	0	0	0	0	0	0	0	0	0	0	0	0	0	0	0	0	0	0	1	0	0	0	1	1	1	0	1	1	0	1	1	2	0	2	1	2	1	2	1	1	2	1	0	2	1
Lewisham	0	0	0	0	0	0	0	0	0	0	0	0	0	0	0	1	0	0	1	0	2	4	0	2	4	5	7	2	3	3	11	10	10	3	11	6	10	11	7	5	11	8	2	5	3	3	7	5	8
Lichfield	0	0	0	0	0	0	0	0	0	0	0	0	0	0	0	0	1	0	0	0	0	0	0	0	0	0	0	0	4	2	4	2	1	4	2	3	1	6	8	0	1	3	2	1	3	2	0	4	3
Lincoln	0	0	0	0	0	0	0	0	0	0	0	0	0	0	0	0	0	0	0	0	0	0	0	0	1	0	1	0	0	0	1	1	1	0	0	0	0	0	1	2	1	1	0	1	0	1	1	0	0
Liverpool	0	0	0	0	0	0	0	0	0	0	0	0	0	0	0	0	0	0	1	1	3	0	1	1	2	2	5	1	3	7	4	8	13	8	10	13	9	19	16	13	13	7	7	12	9	11	11	5	12
Luton	0	0	0	0	0	0	0	0	0	0	0	0	0	0	1	0	0	0	0	0	1	0	0	1	0	1	2	4	4	2	3	5	7	4	4	11	2	4	9	4	3	5	8	2	6	3	2	5	6
Maidstone	0	0	0	0	0	0	0	0	0	0	0	0	0	0	0	0	0	0	0	0	0	0	0	0	0	0	1	0	2	1	3	2	1	0	3	1	0	3	2	0	1	0	0	1	1	1	0	1	2
Maldon	0	0	0	0	0	0	0	0	0	0	0	0	0	0	0	0	0	0	0	0	0	0	0	0	1	2	1	0	1	0	0	0	1	1	1	1	1	2	0	1	0	1	0	2	1	2	1	1	0
Malvern Hills	0	0	0	0	0	0	0	0	0	0	0	0	0	0	0	0	0	0	0	0	0	0	0	0	0	0	0	0	0	0	1	2	0	1	3	2	2	0	1	1	1	2	1	2	1	2	2	1	1
Manchester	0	0	0	0	0	0	0	0	0	0	0	0	0	0	0	0	1	0	0	0	0	0	1	1	1	3	4	0	3	3	3	8	5	8	8	4	7	15	11	13	4	10	8	11	8	8	11	11	6
Mansfield	0	0	0	0	0	0	0	0	0	0	0	0	0	0	0	0	0	0	0	0	0	1	0	1	0	0	0	0	1	1	5	3	0	1	0	3	3	0	3	0	3	0	1	0	0	1	0	1	0
Medway	0	0	0	0	0	0	0	0	0	0	0	0	0	0	0	0	0	0	0	0	1	0	0	1	2	1	3	1	4	1	7	2	3	1	3	5	5	5	1	6	8	6	8	3	3	3	2	4	6
Melton	0	0	0	0	0	0	0	0	0	0	0	0	0	0	0	0	0	0	0	0	0	0	0	1	0	0	0	0	0	0	0	0	1	1	0	0	1	0	0	3	0	0	0	0	0	0	0	0	0
Mendip	0	0	0	0	0	0	0	0	0	0	0	0	0	0	0	0	0	0	0	0	0	0	0	0	0	0	0	0	0	0	3	0	0	0	0	0	0	2	1	1	0	0	0	0	0	0	0	0	1
Merthyr Tydfil	0	0	0	0	0	0	0	0	0	0	0	0	0	0	0	0	0	0	0	0	0	0	0	0	0	0	0	0	0	0	0	0	0	0	0	0	0	0	0	0	0	0	0	0	0	0	0	0	0
Merton	0	0	0	0	0	0	0	0	1	0	0	2	0	0	0	1	0	0	0	1	3	2	1	3	2	4	3	1	2	3	5	4	5	8	4	6	8	6	9	2	8	3	5	4	1	8	2	3	5
Mid Devon	0	0	0	0	0	0	0	0	0	0	0	0	0	0	0	0	0	0	0	0	0	0	0	0	0	0	0	0	0	0	0	0	0	1	1	0	0	0	1	0	0	0	0	0	0	1	1	1	0
Mid Suffolk	0	0	0	0	0	0	0	0	0	0	0	0	0	0	0	0	0	0	0	0	0	0	0	1	0	0	0	0	0	1	1	1	1	0	0	2	1	1	0	2	0	1	2	0	1	1	0	2	0
Mid Sussex	0	0	0	0	0	0	0	0	0	0	0	0	0	0	0	0	0	0	0	0	0	1	1	0	2	2	0	0	2	0	1	1	2	1	1	4	6	1	1	3	3	5	0	5	0	2	3	2	2
Middlesbrough	0	0	0	0	0	0	0	0	0	0	0	0	0	0	0	0	0	0	0	0	0	0	0	0	1	0	2	0	1	7	3	7	1	5	4	4	3	3	4	0	4	8	2	5	6	7	2	3	5
Milton Keynes	0	0	0	0	1	0	0	0	0	0	0	0	0	1	1	0	0	2	0	0	1	0	0	1	3	4	3	0	0	2	2	3	1	3	5	3	2	5	2	1	4	1	1	7	1	3	3	4	1
Mole Valley	0	0	0	0	0	0	0	0	0	0	0	0	0	0	0	0	0	1	0	0	2	1	0	0	1	2	2	1	1	0	2	2	2	2	4	2	3	0	1	4	3	1	3	4	2	2	2	3	2
Monmouthshire	0	0	0	0	0	0	0	0	0	0	0	0	0	0	0	0	0	0	0	0	0	0	0	0	0	0	0	0	0	0	0	0	0	0	0	0	0	0	0	0	0	0	0	0	0	0	0	0	0
Neath Port Talbot	0	0	0	0	0	0	0	0	0	0	0	0	0	0	0	0	0	0	0	0	0	0	0	0	0	0	0	0	0	0	0	0	0	0	0	0	0	0	0	0	0	0	0	0	0	0	0	0	0
New Forest	0	0	0	0	0	0	0	0	0	0	0	0	0	0	0	0	0	0	0	0	0	0	0	1	0	2	1	0	0	1	0	0	1	1	3	3	0	6	2	2	5	5	1	2	1	2	1	3	4
Newark and Sherwood	0	0	0	0	0	0	0	0	0	0	0	0	0	0	0	0	0	0	0	0	0	1	0	1	0	0	0	0	1	0	1	1	0	2	4	1	3	1	3	3	1	2	1	0	0	2	1	0	0
Newcastle upon Tyne	0	0	0	0	0	0	0	0	0	0	0	0	0	1	0	0	0	0	0	0	0	0	0	1	0	0	1	2	1	1	1	2	2	0	2	2	2	0	6	1	1	3	0	1	0	5	2	3	2
Newcastle-under-Lyme	0	0	0	0	0	0	0	0	0	0	0	0	0	0	0	0	0	0	0	0	2	2	0	0	0	1	0	0	1	3	2	4	2	4	4	4	4	3	4	5	9	3	3	6	2	1	1	8	5
Newham	0	0	0	0	0	0	0	0	0	0	0	1	0	1	0	1	2	0	1	2	1	2	3	3	5	3	1	8	9	4	5	2	10	8	5	10	9	9	13	3	10	4	7	7	3	4	5	6	3
Newport	0	0	0	0	0	0	0	0	0	0	0	0	0	0	0	0	0	0	0	0	0	0	0	0	0	0	0	0	0	0	0	0	0	0	0	0	0	0	0	0	0	0	0	0	0	0	0	0	0
North Devon	0	0	0	0	0	0	0	0	0	0	0	0	0	0	0	0	0	0	0	0	0	0	0	0	0	0	0	0	0	0	0	0	0	0	0	0	0	1	1	0	1	0	1	0	1	1	1	2	1
North East Derbyshire	0	0	0	0	0	0	0	0	0	0	0	0	0	0	0	0	0	0	0	0	0	0	0	1	2	0	2	0	1	1	1	1	1	1	1	2	2	0	1	3	1	1	1	2	5	3	2	2	1
North East Lincolnshire	0	0	0	0	0	0	0	0	0	0	0	0	0	0	0	0	0	0	0	0	0	0	0	0	1	2	0	0	0	0	2	1	2	1	0	0	0	0	1	3	1	0	0	1	0	2	1	1	0
North Hertfordshire	0	0	0	0	0	0	0	0	0	0	0	0	0	0	0	0	0	0	0	0	0	0	0	1	0	0	0	0	1	1	1	0	2	4	3	1	2	2	2	0	1	3	0	1	1	1	1	0	0
North Kesteven	0	0	0	0	0	0	0	0	0	0	0	0	0	0	0	0	0	0	0	0	0	0	0	0	0	0	0	0	0	1	0	1	2	2	3	1	1	0	2	2	5	2	2	1	2	0	0	2	0
North Lincolnshire	0	0	0	0	0	0	0	0	0	0	0	0	0	0	0	0	0	0	0	0	0	0	0	0	0	0	0	1	0	0	1	0	1	1	1	0	0	1	0	1	2	1	2	0	2	0	1	1	1
North Norfolk	0	0	0	0	0	0	0	0	0	0	0	0	0	0	0	0	0	0	0	0	0	0	0	0	0	0	1	0	0	1	1	2	0	3	2	1	0	0	1	1	1	3	2	0	1	0	1	0	1
North Somerset	0	0	0	0	0	0	0	0	0	0	0	0	0	1	0	0	0	0	0	0	0	0	0	0	0	0	1	0	1	2	0	1	2	2	0	0	2	1	1	0	0	3	1	1	1	1	2	1	1
North Tyneside	0	0	0	0	0	0	0	0	0	0	0	0	0	0	0	0	0	0	0	0	0	0	0	0	1	0	2	1	0	3	1	1	0	3	2	2	2	2	3	3	1	0	2	0	4	3	1	2	4
North Warwickshire	0	0	0	0	0	0	0	0	0	0	0	0	0	0	1	0	0	0	1	0	1	0	1	0	1	0	2	0	0	0	0	1	1	0	1	1	0	0	0	1	2	3	0	2	0	3	1	2	2
North West Leicestershire	0	0	0	0	0	0	0	0	0	0	0	0	0	0	0	0	0	0	0	0	0	0	1	0	0	2	0	0	0	0	2	0	2	1	1	2	5	2	0	1	1	0	2	2	1	1	1	2	2
Northampton	0	0	0	0	0	0	0	0	0	0	0	0	0	0	0	1	0	0	0	0	0	0	0	0	0	1	2	0	2	3	1	2	0	3	4	1	5	5	5	5	3	4	7	5	6	6	4	4	5
Northumberland	0	0	0	0	0	0	0	0	0	0	0	0	0	0	0	0	0	1	0	0	0	0	0	0	1	1	1	1	0	1	1	3	4	5	6	8	3	5	2	4	3	6	1	6	5	3	4	4	8
Norwich	0	0	0	0	0	0	0	0	0	0	0	0	0	0	0	0	0	0	0	0	0	0	0	0	0	0	0	0	1	0	0	0	1	0	0	0	0	0	0	0	0	0	0	0	0	2	0	0	0
Nottingham	0	0	0	0	0	0	0	0	0	0	0	0	0	0	0	0	0	0	0	0	1	2	0	1	1	2	2	2	2	1	0	1	2	1	3	2	5	2	6	0	1	3	6	1	4	5	2	6	6
Nuneaton and Bedworth	0	0	0	0	0	0	0	0	0	0	1	0	1	0	0	0	0	1	0	2	1	1	1	1	5	2	1	1	4	2	0	1	1	1	3	2	0	2	3	2	3	2	2	3	1	2	3	1	1
Oadby and Wigston	0	0	0	0	0	0	0	0	0	0	0	0	0	0	0	0	0	0	0	0	0	1	1	0	0	0	0	1	0	0	0	2	1	3	1	0	1	0	0	2	0	1	1	1	0	1	0	1	0
Oldham	0	0	0	0	0	0	0	1	0	0	0	0	0	0	0	0	1	1	0	0	1	1	1	3	0	1	2	3	1	2	3	2	2	6	2	5	3	5	2	3	10	8	13	5	6	4	4	7	6
Oxford	0	0	0	0	0	0	0	0	0	0	0	0	0	0	0	0	0	0	0	1	0	0	0	0	1	1	0	1	1	1	0	1	0	1	0	0	3	1	1	1	1	1	1	2	0	0	0	1	1
Pembrokeshire	0	0	0	0	0	0	0	0	0	0	0	0	0	0	0	0	0	0	0	0	0	0	0	0	0	0	0	0	0	0	0	0	0	0	0	0	0	0	0	0	0	0	0	0	0	0	0	0	0
Pendle	0	0	0	0	0	0	0	0	0	0	0	0	0	0	0	0	0	0	0	0	0	0	1	0	0	0	0	0	2	0	0	2	1	1	2	0	0	1	3	1	2	1	3	2	2	1	0	0	4
Peterborough	0	0	0	0	0	0	0	0	0	0	0	0	0	0	0	0	0	0	0	0	1	0	0	0	0	0	0	0	0	0	0	1	1	3	1	0	1	5	1	0	1	1	2	0	1	1	2	2	3
Plymouth	0	0	0	0	0	0	0	0	0	0	0	0	0	0	0	0	0	0	0	0	0	1	0	0	0	0	0	0	1	2	0	1	0	1	2	2	1	0	5	4	3	1	2	1	1	1	1	2	2
Portsmouth	0	0	0	0	0	0	0	0	0	0	0	0	0	0	0	1	1	0	0	2	1	1	1	2	0	2	1	1	1	2	0	3	5	0	1	1	2	0	4	2	2	3	1	1	1	3	0	1	2
Powys	0	0	0	0	0	0	0	0	0	0	0	0	0	0	0	0	0	0	0	0	0	0	0	0	0	0	0	0	0	0	0	0	0	0	0	0	0	0	0	0	0	0	0	0	0	0	0	0	0
Preston	0	0	0	0	0	0	0	0	0	0	0	0	0	0	0	0	0	0	0	0	0	1	0	0	0	0	0	0	1	2	0	2	0	2	2	1	3	2	1	0	1	2	1	2	3	2	1	1	0
Reading	0	0	0	0	0	0	0	0	0	0	0	0	0	0	0	0	0	0	0	0	0	0	0	0	1	1	1	0	2	2	1	3	1	1	4	3	3	2	3	1	6	2	2	5	3	2	4	3	0
Redbridge	0	0	0	0	0	0	0	0	0	0	0	0	1	0	0	0	0	1	0	2	0	2	2	4	2	7	6	4	7	7	4	5	7	5	5	10	6	6	7	13	4	8	9	5	6	5	4	1	6
Redcar and Cleveland	0	0	0	0	0	0	0	0	0	0	0	0	0	0	0	0	0	0	0	0	0	0	0	0	0	0	0	1	1	1	3	2	2	0	1	3	3	0	1	1	1	1	3	1	2	0	4	2	2
Redditch	0	0	0	0	0	0	0	0	0	0	0	0	0	0	0	0	0	0	0	0	0	1	0	1	0	1	0	0	0	0	1	5	1	0	2	2	0	1	1	0	1	1	2	2	2	0	0	0	1
Reigate and Banstead	0	0	0	0	0	0	0	0	0	0	0	0	1	0	0	1	1	0	0	0	3	1	1	2	2	0	2	0	7	1	3	3	3	6	3	3	6	3	4	7	4	0	3	3	2	2	2	2	1
Rhondda Cynon Taf	0	0	0	0	0	0	0	0	0	0	0	0	0	0	0	0	0	0	0	0	0	0	0	0	0	0	0	0	0	0	0	0	0	0	0	0	0	0	0	0	0	0	0	0	0	0	0	0	0
Ribble Valley	0	0	0	0	0	0	0	0	0	0	0	0	0	0	0	0	0	0	0	0	0	0	0	0	0	0	0	0	0	0	0	0	1	2	0	0	0	0	1	2	1	1	1	0	0	0	1	0	0
Richmond upon Thames	0	0	0	0	0	0	0	0	0	0	0	0	0	0	0	0	0	1	0	0	0	3	2	0	2	1	0	1	1	3	3	6	5	4	1	5	1	3	4	4	6	3	3	4	2	2	5	4	5
Richmondshire	0	0	0	0	0	0	0	0	0	0	0	0	0	0	0	0	0	0	0	0	0	0	0	0	0	2	1	0	0	1	0	0	0	1	1	0	0	0	0	0	0	0	0	1	0	1	0	3	1
Rochdale	0	0	0	0	0	0	0	0	0	0	0	0	1	0	0	0	0	0	0	0	1	0	0	3	1	1	4	1	5	5	7	1	7	1	2	5	2	4	4	6	6	6	4	5	6	3	3	4	7
Rochford	0	0	0	0	0	0	0	0	0	0	0	0	0	0	0	0	0	0	0	0	0	1	0	1	0	1	2	0	1	2	2	2	3	2	2	0	2	3	3	0	1	3	4	0	0	0	0	0	0
Rossendale	0	0	0	0	0	0	0	0	0	0	0	0	0	0	0	0	0	0	0	0	0	0	0	0	0	0	0	0	0	0	0	0	0	0	0	0	0	1	1	1	1	0	0	0	1	0	0	0	1
Rother	0	0	0	0	0	0	0	0	0	0	0	0	0	0	0	0	0	0	0	0	0	1	0	0	0	0	0	0	1	0	1	0	0	1	1	0	0	0	0	0	1	1	0	0	1	1	1	0	1
Rotherham	0	0	0	0	0	0	0	0	0	0	0	0	0	0	0	0	0	0	0	1	0	0	0	0	1	0	1	1	1	0	1	5	2	5	4	2	6	6	5	3	4	2	4	6	6	4	5	9	1
Rugby	0	0	0	0	0	0	0	0	0	0	0	0	0	0	0	0	0	0	0	0	0	0	0	0	0	1	0	0	0	2	0	0	2	0	0	0	0	1	2	0	0	2	2	0	2	2	2	0	0
Runnymede	0	0	0	0	0	0	0	0	0	0	0	0	0	0	0	1	0	0	0	0	0	0	0	0	0	0	1	1	1	1	2	1	2	1	3	1	0	2	2	0	1	1	0	2	1	1	3	1	0
Rushcliffe	0	0	0	0	0	0	0	0	0	0	0	0	1	0	0	0	0	0	1	0	0	0	0	0	1	0	0	0	1	0	0	2	1	0	2	0	2	4	2	0	2	1	3	0	2	0	2	2	1
Rushmoor	0	0	0	0	0	0	0	0	0	0	0	0	0	0	0	0	0	0	0	0	0	1	1	0	0	0	0	0	0	1	0	1	1	0	2	1	0	2	0	1	2	0	1	3	1	2	1	0	2
Rutland	0	0	0	0	0	0	0	0	0	0	0	0	0	0	0	0	0	0	0	0	0	0	0	0	0	0	0	0	0	0	0	0	1	0	0	0	0	0	0	0	0	0	0	0	0	1	0	1	0
Ryedale	0	0	0	0	0	0	0	0	0	0	0	0	0	0	0	0	0	0	0	0	0	0	0	0	0	0	0	0	0	1	0	0	0	0	1	0	2	1	0	0	0	1	0	0	0	1	1	0	1
Salford	0	0	0	0	0	0	0	0	0	0	0	0	0	0	0	0	0	0	1	0	1	1	4	4	3	5	0	4	4	6	7	7	6	5	4	7	9	6	5	7	9	3	8	6	4	10	6	1	4
Sandwell	0	0	0	0	0	0	0	0	0	0	0	0	0	0	0	4	0	1	3	3	1	1	3	1	1	1	6	6	4	5	10	7	6	5	8	7	8	10	15	6	12	9	7	7	5	7	9	4	10
Scarborough	0	0	0	0	0	0	0	0	0	0	0	0	0	0	0	0	0	0	0	0	0	0	0	0	0	1	1	0	0	1	1	0	0	2	2	2	0	1	0	2	1	1	2	1	0	1	1	0	1
Sedgemoor	0	0	0	0	0	0	0	0	0	0	0	0	0	0	0	0	0	0	0	0	0	0	1	0	0	0	1	1	1	0	0	0	1	0	1	1	1	2	0	0	1	2	1	2	1	0	0	0	0
Sefton	0	0	0	0	0	0	0	0	0	0	0	0	0	0	0	0	0	0	0	0	1	0	0	0	1	1	1	2	4	3	0	4	4	4	4	7	8	5	7	8	4	5	3	8	5	6	9	4	8
Selby	0	0	0	0	0	0	0	0	0	0	0	0	0	0	0	0	0	0	0	0	0	0	0	1	0	0	0	0	1	0	0	1	1	0	0	0	0	1	0	1	0	0	1	0	2	1	1	0	2
Sevenoaks	0	0	0	0	0	0	0	0	0	0	0	0	0	0	0	0	0	0	0	0	0	1	0	0	0	1	0	0	1	3	0	2	1	2	2	3	0	3	0	3	2	3	4	2	2	2	1	0	1
Sheffield	0	0	0	0	0	0	0	0	0	0	0	1	0	0	0	0	1	0	0	1	1	1	0	4	2	0	2	2	4	2	6	4	3	10	5	13	3	7	10	7	11	9	8	8	12	11	11	9	7
Shropshire	0	0	0	0	0	0	0	0	0	0	0	0	0	0	0	0	0	0	1	0	0	0	0	0	0	3	4	3	5	0	2	3	0	4	2	1	1	0	2	0	2	3	5	1	0	3	2	2	5
Slough	0	0	0	0	0	0	0	0	0	0	0	0	0	0	1	0	1	2	0	1	1	2	2	0	1	0	0	0	1	2	1	2	1	4	2	2	5	2	0	2	1	1	6	0	4	5	2	3	0
Solihull	0	0	0	0	0	0	0	0	0	0	0	0	0	0	0	0	0	0	1	0	0	0	0	0	0	2	4	3	4	3	3	2	8	5	5	10	5	5	6	2	7	4	3	6	6	7	7	9	5
Somerset West and Taunton	0	0	0	0	0	0	0	0	0	0	0	0	0	0	0	0	0	0	0	0	0	0	0	0	1	1	0	1	1	0	0	0	0	0	0	2	1	0	0	0	0	0	0	3	0	0	0	1	3
South Bucks	0	0	0	0	0	0	0	0	0	0	0	0	0	0	0	0	1	1	0	0	0	2	0	1	2	0	1	1	0	2	0	3	2	2	0	1	1	1	0	0	1	1	1	0	0	1	1	2	1
South Cambridgeshire	0	0	0	0	0	0	0	0	0	0	0	0	0	0	0	0	0	0	0	0	0	0	0	0	0	1	0	2	0	1	1	1	0	0	1	1	1	0	1	2	0	1	0	4	1	2	0	2	0
South Derbyshire	0	0	0	0	0	0	0	0	0	0	0	0	0	0	0	0	0	0	0	1	0	0	1	0	1	1	0	2	0	1	2	1	1	1	2	4	1	0	2	2	2	0	1	1	3	3	0	3	1
South Gloucestershire	0	0	0	0	0	0	0	0	0	0	0	0	0	0	0	0	0	0	0	1	0	0	1	1	1	0	0	0	1	2	3	1	3	2	4	5	2	4	6	2	2	3	1	1	1	3	1	3	3
South Hams	0	0	0	0	0	0	0	0	0	0	0	0	0	0	0	0	0	0	0	0	0	1	0	1	0	0	0	0	0	0	0	1	0	0	1	0	0	0	0	0	0	0	0	1	0	0	1	0	1
South Holland	0	0	0	0	0	0	0	0	0	0	0	0	0	0	0	0	0	0	0	0	0	0	1	0	0	0	1	0	0	1	1	0	2	1	0	0	0	0	2	1	2	0	1	1	2	1	0	0	0
South Kesteven	0	0	0	0	0	0	0	0	0	0	0	0	0	0	0	0	0	0	0	0	0	0	0	0	0	0	1	1	0	1	1	1	1	0	1	0	1	0	2	1	2	1	1	0	1	1	1	1	0
South Lakeland	0	0	0	0	0	0	0	0	0	0	0	0	0	0	0	0	0	0	1	0	1	2	1	1	1	0	2	1	0	0	4	6	4	2	5	2	4	2	2	3	2	1	2	0	2	2	0	3	0
South Norfolk	0	0	0	0	0	0	0	0	0	0	0	0	0	0	0	0	0	0	0	0	0	1	0	0	0	0	1	1	2	0	0	0	0	0	1	1	1	1	1	1	0	0	2	0	2	0	0	0	1
South Northamptonshire	0	0	0	0	0	0	0	0	0	0	0	0	0	0	0	0	0	0	0	0	0	1	0	0	0	0	0	1	0	0	1	1	1	2	0	2	0	0	1	1	0	0	1	0	3	1	1	1	0
South Oxfordshire	0	0	0	0	0	0	0	0	0	0	0	0	0	0	0	1	0	1	0	0	0	0	1	1	0	0	0	0	1	1	1	2	1	1	0	2	0	2	0	2	1	4	1	0	1	0	0	2	1
South Ribble	0	0	0	0	0	0	0	0	0	0	0	0	0	0	0	0	0	0	0	0	0	0	0	0	0	0	1	0	0	0	1	0	1	1	0	0	1	0	2	0	1	2	3	1	0	4	0	3	0
South Somerset	0	0	0	0	0	0	0	0	0	0	0	0	0	0	0	0	0	0	0	0	0	0	0	0	0	0	0	0	0	0	0	0	0	1	0	1	2	2	1	0	1	0	1	2	0	0	0	0	0
South Staffordshire	0	0	0	0	0	0	0	0	0	0	0	1	0	0	0	0	0	0	0	1	0	1	1	0	0	2	0	2	1	3	3	1	3	3	2	3	0	4	3	4	3	1	2	5	1	1	2	1	0
South Tyneside	0	0	0	0	0	0	0	0	0	0	0	0	0	0	0	0	0	0	0	0	0	1	1	1	0	0	0	0	1	1	0	0	3	2	7	2	2	1	4	2	3	3	1	3	3	1	0	3	3
Southampton	0	0	0	0	0	0	0	0	0	0	0	0	0	0	1	0	1	0	0	0	0	1	1	0	1	1	1	2	3	0	2	1	0	3	3	1	2	4	2	5	1	2	5	3	2	1	6	5	2
Southend-on-Sea	0	0	0	0	0	0	0	0	0	0	0	0	0	0	0	0	0	0	0	0	0	1	2	0	2	0	0	2	2	2	1	6	1	3	1	7	3	7	6	6	5	2	4	1	2	4	2	0	5
Southwark	0	0	0	0	0	0	0	0	0	0	0	0	0	1	0	1	2	2	1	1	2	3	1	3	5	2	5	4	2	3	7	4	3	3	6	5	8	10	7	9	1	2	3	6	6	2	5	2	2
Spelthorne	0	0	0	0	0	0	0	0	0	0	0	0	0	0	0	1	0	0	0	0	0	0	0	0	1	1	1	0	1	2	2	2	1	1	3	1	1	3	0	5	2	4	1	1	0	0	1	1	1
St Albans	0	0	0	0	0	0	0	0	0	0	0	0	0	0	0	0	0	0	0	0	0	0	0	1	0	0	0	0	2	1	3	2	3	3	2	1	2	4	5	2	0	7	2	4	3	4	5	2	2
St. Helens	0	0	0	0	0	0	0	0	0	0	0	0	0	0	0	0	0	0	0	0	0	0	0	0	0	0	1	1	0	0	3	2	2	2	2	1	2	6	3	3	4	2	3	3	4	5	5	3	3
Stafford	0	0	0	0	0	0	0	0	0	0	0	0	0	0	0	0	0	0	0	0	0	0	0	0	0	0	0	0	0	0	1	2	1	3	0	1	2	0	2	1	3	2	3	2	1	0	1	2	5
Staffordshire Moorlands	0	0	0	0	0	0	0	0	0	0	0	0	0	0	0	0	0	0	0	1	0	0	0	0	1	0	2	0	2	0	1	1	1	3	1	1	0	0	2	2	0	1	1	0	0	0	1	1	0
Steve0ge	0	0	0	0	0	0	0	0	0	0	0	0	0	0	0	0	0	0	0	0	0	0	0	0	0	0	0	0	0	0	1	0	1	1	0	0	1	0	0	0	0	1	2	4	1	2	2	2	1
Stockport	0	0	0	0	0	0	0	0	0	0	0	0	0	0	0	1	0	3	1	1	0	1	0	1	0	5	4	2	1	3	4	9	4	5	6	3	8	5	8	4	9	7	9	5	7	5	7	3	5
Stockton-on-Tees	0	0	0	0	0	0	0	0	0	0	0	0	0	0	1	0	0	0	0	0	0	0	0	0	0	1	0	0	0	1	4	0	1	3	0	3	0	0	0	6	4	2	3	2	1	0	0	1	1
Stoke-on-Trent	0	0	0	0	0	0	0	0	0	0	0	0	0	0	0	0	0	0	0	0	0	0	0	0	1	2	0	0	0	0	3	0	2	1	4	3	1	2	3	0	1	0	3	4	5	4	1	4	2
Stratford-on-Avon	0	0	0	0	0	0	0	0	0	0	0	0	0	0	0	0	0	0	0	0	0	0	1	1	1	1	0	1	1	0	2	0	1	1	4	5	3	0	6	1	4	1	4	2	3	5	3	2	3
Stroud	0	0	0	0	0	0	0	0	0	0	0	0	0	0	0	0	0	0	0	0	0	0	1	0	1	1	0	1	0	2	1	0	0	2	1	1	2	2	5	2	1	2	2	2	5	1	3	3	2
Sunderland	0	0	0	0	0	0	0	0	0	0	0	0	0	0	0	0	0	0	1	0	0	2	0	0	2	3	1	2	2	1	5	8	9	7	9	10	11	6	6	7	11	12	13	3	8	9	3	6	4
Surrey Heath	0	0	0	0	0	0	0	0	0	0	0	0	0	0	0	0	0	0	1	0	0	0	0	1	0	0	0	0	0	0	0	0	1	1	1	0	3	1	0	0	1	2	3	0	0	1	0	1	2
Sutton	0	0	0	0	0	0	0	0	0	0	0	0	0	0	0	1	0	0	1	0	1	0	0	1	1	7	0	3	0	5	4	3	2	5	2	6	1	7	4	1	8	5	3	1	2	6	0	4	2
Swale	0	0	0	0	0	0	0	0	0	0	0	0	0	0	0	0	0	0	1	0	0	0	0	0	2	1	1	0	0	0	0	2	2	0	3	6	2	0	1	4	4	2	3	1	3	0	0	2	5
Swansea	0	0	0	0	0	0	0	0	0	0	0	0	0	0	0	0	0	0	0	0	0	0	0	0	0	0	0	0	0	0	0	0	0	0	0	0	0	0	0	0	0	0	0	0	0	0	0	0	0
Swindon	0	0	0	0	0	0	0	0	0	0	0	0	0	0	0	0	0	0	0	0	0	1	1	0	0	0	0	1	0	3	0	1	1	2	4	1	1	3	1	2	7	1	2	3	4	2	1	3	1
Tameside	0	0	0	0	0	0	0	0	0	0	0	0	1	0	0	1	0	1	1	1	1	0	4	2	2	0	1	3	2	3	2	3	4	5	3	5	3	4	3	5	9	2	4	5	5	1	4	7	6
Tamworth	0	0	0	0	0	0	0	0	0	0	0	0	0	0	0	0	0	0	0	0	0	0	0	0	1	1	1	2	1	1	2	1	1	1	0	3	1	3	2	1	2	4	1	2	1	1	1	1	0
Tandridge	0	0	0	0	0	0	0	0	0	0	0	0	0	0	0	0	0	0	0	0	0	0	0	1	0	0	0	1	1	2	1	1	1	1	4	1	1	0	2	3	0	3	0	0	1	1	1	1	1
Teignbridge	0	0	0	0	0	0	0	0	0	0	0	0	0	0	0	0	1	0	0	0	0	0	0	0	0	0	1	1	1	1	1	0	1	1	1	1	0	0	0	0	1	0	0	0	0	1	0	2	0
Telford and Wrekin	0	0	0	0	0	0	0	0	0	0	0	0	0	0	1	0	0	0	0	0	1	0	0	0	1	0	0	2	0	1	1	1	1	1	1	3	0	2	0	2	1	4	1	2	1	1	1	0	1
Tendring	0	0	0	0	0	0	0	0	0	0	0	0	0	0	0	0	0	0	0	0	1	1	0	1	1	2	2	3	1	3	0	1	3	0	3	1	2	0	2	5	2	3	3	1	4	3	2	5	2
Test Valley	0	0	0	0	0	0	0	0	0	0	0	0	0	0	0	0	0	0	0	0	0	0	0	0	1	0	1	1	0	0	1	0	1	0	0	0	1	2	2	1	1	1	1	0	2	1	1	3	0
Tewkesbury	0	0	0	0	0	0	0	0	0	0	0	0	0	0	0	0	0	0	0	0	1	0	0	0	0	0	0	0	1	0	1	0	2	0	3	2	3	1	1	0	4	2	4	1	0	1	2	2	1
Thanet	0	0	0	0	0	0	0	0	0	0	0	0	0	0	0	0	0	0	0	0	0	1	0	0	0	0	0	1	0	0	2	1	4	0	0	2	2	2	2	1	3	3	4	3	1	1	0	1	0
Three Rivers	0	0	0	0	0	0	0	0	0	0	0	0	0	0	0	0	0	0	0	0	0	0	0	0	1	0	0	3	0	0	5	4	1	3	1	1	1	4	0	1	2	2	2	1	2	0	2	2	2
Thurrock	0	0	0	0	0	0	0	0	0	0	0	0	0	0	0	0	0	0	1	0	0	0	1	1	1	1	2	1	1	3	3	2	2	0	3	1	6	4	4	3	4	2	10	6	2	3	7	0	4
Tonbridge and Malling	0	0	0	0	0	0	0	0	0	0	0	0	0	0	0	0	0	1	0	1	1	0	0	1	0	2	1	0	1	1	0	0	0	0	0	0	2	1	1	1	2	1	0	0	1	0	0	0	2
Torbay	0	0	0	0	0	0	0	0	0	0	0	0	0	0	0	0	0	0	1	1	0	0	0	0	0	0	0	1	2	1	0	2	1	0	1	1	0	1	0	0	2	0	1	2	0	0	2	0	2
Torfaen	0	0	0	0	0	0	0	0	0	0	0	0	0	0	0	0	0	0	0	0	0	0	0	0	0	0	0	0	0	0	0	0	0	0	0	0	0	0	0	0	0	0	0	0	0	0	0	0	0
Torridge	0	0	0	0	0	0	0	0	0	0	0	0	0	0	0	0	0	0	0	0	0	0	0	0	0	0	0	0	0	0	0	0	0	0	0	0	1	0	0	0	1	0	0	0	0	3	3	1	1
Tower Hamlets	0	0	0	0	0	0	0	0	0	0	0	0	1	0	0	0	0	0	0	0	0	1	1	2	3	3	4	1	4	2	6	1	1	3	9	5	3	7	4	7	7	5	4	5	3	2	2	1	2
Trafford	0	0	0	0	0	0	0	0	0	0	1	0	0	0	1	0	0	0	2	1	0	1	0	0	1	1	1	1	1	2	1	0	4	3	1	2	0	7	1	5	5	6	3	3	5	3	6	6	3
Tunbridge Wells	0	0	0	0	0	0	0	0	0	0	0	0	0	0	0	0	0	0	0	0	0	0	0	0	1	0	0	0	1	0	0	2	2	2	0	0	2	0	1	1	0	0	1	1	0	1	1	0	0
Uttlesford	0	0	0	0	0	0	0	0	0	0	0	0	0	0	0	1	0	0	0	0	0	0	0	0	0	0	1	0	1	2	1	3	0	0	1	2	0	3	2	0	0	3	1	0	1	0	2	0	0
Vale of Glamorgan	0	0	0	0	0	0	0	0	0	0	0	0	0	0	0	0	0	0	0	0	0	0	0	0	0	0	0	0	0	0	0	0	0	0	0	0	0	0	0	0	0	0	0	0	0	0	0	0	0
Vale of White Horse	0	0	0	0	0	0	0	0	0	0	0	0	0	0	0	0	0	0	0	0	0	0	0	1	0	0	0	0	1	1	1	2	3	2	2	2	1	4	1	0	0	3	1	1	1	0	1	1	2
Wakefield	0	0	0	0	0	0	0	0	0	0	0	0	0	0	1	0	0	0	0	0	0	0	0	0	1	2	2	2	3	0	5	3	4	6	7	4	5	6	7	7	6	4	5	8	5	7	6	6	4
Walsall	0	0	0	0	0	0	0	0	0	0	0	1	0	0	1	0	1	1	0	0	0	1	3	3	3	3	8	10	2	2	4	9	8	13	7	4	6	9	10	8	9	8	9	11	6	4	7	11	5
Waltham Forest	0	0	0	0	0	0	0	0	0	0	0	1	0	0	0	0	1	1	0	1	1	2	1	3	1	4	7	1	2	8	4	11	5	7	5	7	8	2	3	3	8	3	8	2	8	6	2	6	0
Wandsworth	0	0	0	0	0	0	0	0	0	0	0	0	0	1	0	2	2	2	3	5	1	2	1	2	9	6	3	4	4	2	7	4	2	3	7	5	3	6	7	5	6	5	5	4	5	5	4	3	4
Warrington	0	0	0	0	0	0	0	0	0	0	0	0	0	0	0	0	0	0	0	0	0	0	0	0	0	0	0	0	0	1	4	1	0	2	3	1	8	4	3	2	1	2	5	4	6	2	5	3	5
Warwick	0	0	0	0	0	0	0	0	0	0	0	0	0	0	0	0	0	0	0	0	1	0	0	0	0	0	0	0	1	2	1	1	3	1	3	4	2	2	0	3	0	2	3	0	1	1	1	1	2
Watford	0	0	0	0	0	0	0	0	0	0	0	0	0	0	0	0	0	0	0	0	0	0	0	0	1	0	2	1	0	0	3	1	1	3	2	3	3	2	5	3	2	3	2	2	1	3	1	2	3
Waverley	0	0	0	0	0	0	0	0	0	0	0	0	0	0	0	0	0	0	1	0	0	0	0	0	0	1	0	2	1	3	0	1	1	0	1	3	0	2	2	0	1	0	0	2	3	0	0	1	0
Wealden	0	0	0	0	0	0	0	0	0	0	0	0	0	0	0	0	1	0	0	0	0	0	0	0	0	0	2	1	0	1	0	0	0	2	3	1	1	2	1	1	3	2	1	1	2	2	2	0	2
Wellingborough	0	0	0	0	0	0	0	0	0	0	0	0	0	0	0	0	0	0	0	0	0	0	1	0	0	0	0	0	0	0	0	0	0	1	0	2	0	1	2	2	0	1	2	0	2	2	1	0	0
Welwyn Hatfield	0	0	0	0	0	0	0	0	0	0	0	0	0	0	0	0	0	0	1	0	0	0	1	0	1	1	2	1	1	2	2	1	2	2	0	2	3	3	3	2	0	0	1	0	1	0	0	1	2
West Berkshire	0	0	0	0	0	0	0	0	0	0	0	0	0	0	0	0	0	0	0	1	0	0	0	0	0	3	2	1	1	0	1	2	1	1	4	0	2	2	4	3	1	0	1	0	4	2	2	0	2
West Devon	0	0	0	0	0	0	0	0	0	0	0	0	0	0	0	0	0	0	0	0	0	0	0	0	0	0	0	1	0	0	0	0	1	0	0	1	0	0	0	0	1	0	0	1	1	0	0	1	0
West Lancashire	0	0	0	0	0	0	0	0	0	0	0	0	0	0	0	0	0	0	0	0	0	0	0	0	0	0	1	1	1	0	1	1	3	2	4	4	2	2	5	1	1	4	1	3	4	2	1	3	1
West Lindsey	0	0	0	0	0	0	0	0	0	0	0	0	0	0	0	0	0	0	0	0	0	0	0	0	0	0	0	0	0	0	0	0	0	1	0	1	1	0	0	2	0	0	0	0	0	0	1	1	1
West Oxfordshire	0	0	0	0	0	0	0	0	0	0	0	0	0	0	0	0	0	0	0	1	0	0	0	0	0	2	1	0	2	0	1	1	1	1	0	1	3	0	2	3	1	1	1	0	0	1	0	3	0
West Suffolk	0	0	0	0	0	0	0	0	0	0	0	0	0	0	0	0	0	0	1	0	0	0	0	1	0	0	0	1	0	0	2	0	0	0	0	0	0	0	1	2	2	0	0	1	1	3	1	0	2
Westminster	0	0	0	0	0	0	0	0	0	0	0	0	0	0	1	0	3	1	2	0	1	2	1	2	2	3	3	8	3	4	5	4	2	6	5	3	3	7	4	4	3	4	4	6	1	4	0	3	4
Wigan	0	0	0	0	0	0	0	0	0	0	0	0	0	0	0	0	0	0	0	0	0	1	1	0	1	0	0	1	2	2	1	6	5	3	4	4	4	7	4	2	5	6	8	8	11	9	16	8	10
Wiltshire	0	0	0	0	0	0	0	0	0	0	1	0	0	0	0	0	0	1	1	0	0	0	0	0	1	1	3	0	2	3	3	5	2	3	3	3	3	4	4	4	9	2	3	3	4	3	5	1	4
Winchester	0	0	0	0	0	0	0	0	0	0	0	0	0	0	0	0	0	0	0	0	0	1	0	0	2	0	0	0	1	1	2	0	0	0	2	2	3	0	2	1	1	4	1	3	0	3	2	1	3
Windsor and Maidenhead	0	0	0	0	0	0	0	0	0	0	0	0	0	0	1	1	0	1	1	1	0	0	1	0	0	0	2	1	5	1	2	1	2	3	3	2	1	3	1	1	1	4	2	2	1	0	1	1	1
Wirral	0	0	0	0	0	0	0	0	0	0	0	0	0	0	1	0	0	1	0	1	0	0	0	0	2	3	2	1	1	7	6	4	6	7	8	9	5	8	9	9	9	12	8	5	11	7	9	5	4
Woking	0	0	0	0	0	0	0	0	0	0	0	0	0	0	0	0	0	0	0	0	0	0	0	0	0	1	0	0	1	2	1	1	1	1	2	0	0	0	1	0	0	0	3	1	2	2	1	0	1
Wokingham	0	0	0	0	1	0	0	0	0	0	0	0	0	0	0	0	0	1	1	0	0	0	0	0	0	0	0	0	1	1	1	1	2	2	2	0	4	5	1	2	1	1	4	2	2	1	1	2	2
Wolverhampton	0	0	0	0	0	0	0	1	0	0	0	1	0	1	1	2	4	0	2	4	4	1	4	4	6	0	2	5	3	8	4	9	11	4	5	7	7	3	5	6	5	6	1	5	4	8	4	6	2
Worcester	0	0	0	0	0	0	0	0	0	0	0	0	0	0	0	0	0	0	0	0	0	0	1	2	0	0	0	0	1	0	2	0	3	0	2	1	1	1	0	0	2	0	2	2	0	1	0	1	0
Worthing	0	0	0	0	0	0	0	0	0	0	0	0	0	0	0	0	0	0	0	0	0	0	0	0	0	1	0	0	0	1	1	0	1	0	1	0	1	0	1	1	0	0	1	1	2	0	2	3	0
Wrexham	0	0	0	0	0	0	0	0	0	0	0	0	0	0	0	0	0	0	0	0	0	0	0	0	0	0	0	0	0	0	0	0	0	0	0	0	0	0	0	0	0	0	0	0	0	0	0	0	0
Wychavon	0	0	0	0	0	0	0	0	0	0	0	0	0	0	0	0	0	0	0	1	0	0	0	1	1	2	1	2	0	0	0	4	1	2	1	0	1	2	1	2	2	1	4	2	1	1	1	1	3
Wycombe	0	0	0	0	0	0	0	0	1	0	0	0	1	0	0	1	0	0	1	0	0	0	0	2	1	0	1	0	0	2	0	1	0	0	3	1	2	3	3	2	0	1	0	1	0	0	3	1	0
Wyre	0	0	0	0	0	0	0	0	0	0	0	0	0	0	0	0	0	0	0	0	0	0	0	0	0	0	0	0	1	0	0	1	2	1	0	1	1	1	1	1	1	0	6	1	2	1	3	0	0
Wyre Forest	0	0	0	0	0	0	0	0	0	0	0	0	0	0	0	0	0	0	0	1	1	0	0	0	2	4	0	1	1	0	3	2	2	0	1	0	2	2	2	3	2	1	3	2	0	3	3	0	3
York	0	0	0	0	0	0	0	0	0	0	0	0	0	0	1	0	0	0	0	0	0	0	0	0	1	0	1	0	2	0	0	2	0	2	3	1	0	1	2	1	1	0	2	2	3	4	1	2	2
[truncated: 268 more columns]
