# Supplementary material for: Homogeneous and heterogeneous propagation of COVID-19 from super-spreading to super-isolation
Source: Research Square preprint supplement (doi:10.21203/rs.3.rs-276177/v1), 2021-03-11
Supplement: Supplementary file 2 [file 46a82bc18f021a5f8fef2b3a.xlsx]

## Sheet: output
Area name	2020-03-01	2020-03-02	2020-03-03	2020-03-04	2020-03-05	2020-03-06	2020-03-07	2020-03-08	2020-03-09	2020-03-10	2020-03-11	2020-03-12	2020-03-13	2020-03-14	2020-03-15	2020-03-16	2020-03-17	2020-03-18	2020-03-19	2020-03-20	2020-03-21	2020-03-22	2020-03-23	2020-03-24	2020-03-25	2020-03-26	2020-03-27	2020-03-28	2020-03-29	2020-03-30	2020-03-31	2020-04-01	2020-04-02	2020-04-03	2020-04-04	2020-04-05	2020-04-06	2020-04-07	2020-04-08	2020-04-09	2020-04-10	2020-04-11	2020-04-12	2020-04-13	2020-04-14	2020-04-15	2020-04-16	2020-04-17	2020-04-18
Adur	0	0	0	0	0	0	0	0	0	0	0	0	0	0	0	0	0	0	1	0	0	1	1	1	1	2	1	0	1	1	2	1	1	5	3	1	5	7	6	2	0	1	2	1	4	4	7	3	5
Allerdale	0	0	0	0	0	0	0	0	0	0	0	1	1	0	0	2	1	3	3	2	3	2	3	3	4	4	3	2	4	5	6	7	9	6	2	2	9	10	16	6	6	2	1	5	8	2	1	3	5
Amber Valley	0	0	0	0	0	0	0	0	0	0	0	1	3	2	3	2	1	1	1	1	4	5	1	4	2	2	5	4	4	3	8	1	7	4	2	1	4	2	5	3	2	1	7	3	3	7	3	4	0
Arun	0	0	0	0	0	0	0	0	0	0	0	0	0	1	0	0	0	1	0	1	1	1	1	2	2	2	3	4	1	2	4	0	2	2	5	2	6	3	3	4	3	4	5	7	3	9	12	6	5
Ashfield	0	0	0	0	0	0	0	0	0	0	0	0	0	3	3	1	0	2	0	0	4	1	0	3	2	5	8	2	2	4	3	5	10	4	4	6	5	5	4	4	3	7	12	7	17	12	14	22	12
Ashford	0	0	1	0	0	0	0	0	0	0	0	1	1	1	1	0	0	2	1	1	0	1	6	1	3	4	2	8	5	6	13	12	3	3	8	10	20	8	13	10	16	4	19	7	3	28	29	36	15
Aylesbury Vale	0	0	0	1	0	0	0	0	0	0	0	2	1	1	0	0	0	0	2	2	3	1	2	1	8	2	2	3	5	11	5	6	15	8	9	8	7	17	16	14	10	4	2	14	11	7	18	15	9
Babergh	0	0	0	0	0	0	0	0	0	0	0	0	0	1	1	0	0	2	0	0	1	0	3	0	0	1	3	2	2	2	3	4	3	4	1	2	3	2	3	1	1	2	2	2	1	3	11	3	14
Barking and Dagenham	1	0	0	0	0	1	0	1	1	0	1	4	1	2	4	4	5	5	4	9	10	7	11	12	11	7	12	11	11	10	19	22	26	17	17	19	13	22	21	15	11	9	18	18	14	12	12	9	7
Barnet	0	0	0	4	1	1	0	1	3	3	11	5	6	6	10	11	7	14	26	21	18	26	31	38	46	55	54	34	31	42	48	37	65	37	38	40	38	46	49	34	21	20	18	23	21	24	20	21	15
Barnsley	0	1	2	0	0	0	0	0	0	0	1	0	0	2	1	0	2	3	5	1	4	7	13	16	10	21	15	14	13	15	33	26	14	9	12	2	13	23	16	19	25	25	21	33	27	13	12	18	16
Barrow-in-Furness	0	0	0	0	0	0	0	0	0	0	0	0	2	2	0	2	5	4	4	4	7	5	8	10	13	15	14	9	25	3	19	33	14	6	23	53	33	28	28	15	10	5	11	20	15	9	8	4	3
Basildon	0	0	0	0	0	0	0	0	0	0	0	0	1	1	1	0	1	0	2	1	0	7	9	8	12	10	4	7	7	11	12	15	18	10	14	5	23	21	16	8	4	6	7	9	3	6	9	10	8
Basingstoke and Deane	0	0	0	1	0	3	0	0	4	1	2	13	3	0	0	3	5	3	6	7	1	1	13	7	8	19	14	24	14	27	23	19	27	32	17	19	27	20	21	20	25	10	11	18	15	11	11	9	10
Bassetlaw	0	0	1	0	0	0	0	0	0	0	0	0	0	0	0	0	0	0	0	2	0	2	0	2	1	1	1	7	4	8	9	5	1	5	5	1	0	5	10	11	4	6	10	8	2	10	9	9	5
Bath and North East Somerset	0	0	0	0	0	0	0	0	0	0	1	2	1	0	0	1	0	5	3	3	1	2	4	3	4	5	4	2	6	5	1	5	4	4	1	5	11	7	8	11	16	10	2	6	9	8	5	6	5
Bedford	0	0	0	0	0	0	0	0	0	0	0	0	1	0	0	0	2	2	3	0	1	5	11	8	6	9	15	5	3	7	13	12	12	20	5	6	13	16	20	22	18	10	10	16	20	13	20	17	13
Bexley	0	0	0	0	0	0	0	0	2	2	4	5	4	3	1	4	6	6	5	9	4	10	17	13	19	12	19	10	14	15	21	29	26	31	28	20	24	47	16	18	19	17	12	12	25	19	23	19	10
Birmingham	1	1	0	0	1	0	0	1	1	4	6	7	14	7	12	15	24	32	35	52	30	26	64	67	61	92	70	79	107	122	132	106	102	81	87	72	63	76	77	49	60	33	46	37	71	78	116	97	109
Blaby	0	0	0	0	1	0	0	0	0	0	1	0	0	0	2	2	0	2	1	3	2	7	3	1	0	4	3	3	1	0	4	8	2	6	0	3	8	2	2	5	4	2	3	3	1	5	4	14	4
Blackburn with Darwen	0	0	0	0	0	0	0	0	0	0	0	0	1	0	0	0	0	0	0	2	0	1	3	4	1	2	4	4	8	8	8	8	12	9	10	8	10	14	12	17	12	10	12	11	16	9	11	5	18
Blackpool	0	0	0	0	0	0	0	0	0	1	0	1	0	1	0	1	2	0	0	1	1	0	1	1	1	4	2	5	4	6	12	5	17	8	14	3	6	10	13	11	17	15	11	15	8	13	16	20	27
Blaenau Gwent	0	0	0	0	0	0	0	0	0	0	1	1	3	1	3	1	2	1	2	8	2	3	3	4	5	6	5	3	5	9	15	6	8	9	12	4	16	5	15	7	5	10	2	8	9	10	10	10	9
Bolsover	0	0	0	1	0	0	0	0	0	0	1	0	0	0	1	1	0	2	0	0	0	2	2	1	3	3	3	4	0	6	3	5	3	2	6	0	2	6	4	6	1	2	3	3	3	4	3	7	5
Bolton	1	0	0	0	1	0	1	0	0	0	2	1	1	0	2	3	1	3	2	2	1	3	2	5	5	6	7	11	3	17	22	25	17	35	24	15	32	24	45	42	29	30	25	35	31	41	37	26	34
Boston	0	0	0	0	0	0	0	0	0	1	0	0	0	0	0	0	0	0	1	0	1	0	0	1	3	0	1	4	1	4	3	4	4	1	4	2	6	9	3	3	13	12	6	8	12	8	9	6	5
Bournemouth, Christchurch and Poole	0	0	0	0	1	1	0	0	0	2	0	3	0	1	0	0	1	1	1	0	3	1	1	5	5	9	9	7	6	13	6	15	12	11	8	12	20	18	15	17	21	7	22	14	18	9	26	13	13
Bracknell Forest	0	0	1	0	0	0	0	0	2	0	0	0	0	0	1	1	1	0	1	1	5	2	2	1	3	3	2	5	4	3	9	10	3	10	7	4	4	11	10	3	4	9	7	16	10	5	5	8	7
Bradford	0	0	0	0	0	0	0	0	0	2	0	2	0	2	0	0	3	2	0	2	3	3	6	9	7	10	20	13	20	23	20	21	19	24	21	27	36	32	35	30	21	19	28	19	22	51	36	38	36
Braintree	0	0	0	0	0	0	0	0	0	0	0	0	0	0	0	2	1	1	0	2	2	4	1	3	2	5	5	5	1	6	7	9	3	6	6	5	3	7	7	4	5	5	3	5	4	3	8	6	3
Breckland	0	0	0	0	0	0	0	0	0	0	0	0	1	0	0	1	0	1	0	1	0	2	4	2	3	4	3	3	3	7	6	3	3	3	8	7	4	5	5	6	4	9	4	8	8	9	4	6	7
Brent	0	0	0	0	0	0	1	1	3	4	10	9	3	7	8	10	23	20	22	21	18	26	46	27	45	45	48	32	52	57	46	56	59	53	49	36	37	28	43	29	40	22	27	26	32	30	40	37	28
Brentwood	0	0	1	0	0	0	0	0	0	0	0	0	1	0	0	0	3	2	1	0	0	1	3	2	0	3	3	2	8	7	9	8	4	13	7	3	6	5	11	4	3	3	6	2	3	3	3	3	3
Bridgend	0	0	0	0	0	0	0	0	0	0	0	0	1	0	0	2	0	0	0	4	4	2	5	8	6	3	5	4	5	5	10	16	19	17	11	12	10	22	15	16	7	13	17	9	21	19	12	15	4
Brighton and Hove	0	0	0	1	0	0	1	0	0	2	0	0	2	0	2	2	0	4	2	3	3	3	4	7	6	9	12	8	9	6	6	19	13	10	13	11	10	16	19	5	13	8	12	11	17	17	13	15	15
Bristol, City of	0	0	1	0	0	1	1	0	0	1	0	1	3	2	1	0	4	7	2	4	8	5	10	4	12	14	13	10	12	17	18	17	14	20	10	14	13	22	28	17	18	26	15	16	17	22	28	14	14
Broadland	0	0	0	0	0	0	0	0	0	0	0	0	1	0	0	0	1	1	0	0	2	1	2	2	0	2	1	2	3	6	3	4	2	7	1	6	3	7	5	7	6	7	3	7	5	4	3	1	3
Bromley	1	0	0	0	0	0	0	1	1	2	5	6	4	6	7	6	9	13	6	18	16	24	35	30	26	28	30	32	22	39	46	49	39	31	37	28	40	38	47	33	24	25	13	33	22	26	29	27	15
Bromsgrove	0	0	0	0	0	0	0	0	0	2	1	1	0	0	0	0	4	5	3	4	5	1	3	1	5	7	1	8	8	8	9	8	4	8	3	10	6	4	10	7	7	11	3	3	7	9	16	12	12
Broxbourne	0	0	0	0	0	0	0	0	0	1	0	1	1	1	2	0	1	4	1	1	6	6	4	2	4	8	2	6	4	6	7	7	5	6	4	4	4	4	9	6	5	2	3	6	2	7	2	3	6
Broxtowe	0	0	0	0	0	0	1	0	0	1	0	3	0	1	0	1	0	2	2	2	2	2	1	3	2	4	7	5	7	3	2	7	2	7	2	4	7	7	9	11	3	4	7	7	11	6	9	4	7
Burnley	0	0	0	0	0	0	0	0	0	0	0	0	0	0	0	0	0	0	1	0	0	0	1	3	1	0	4	2	0	7	5	7	8	6	5	10	9	10	5	10	4	5	6	5	6	4	3	1	11
Bury	2	0	0	0	0	0	1	0	0	0	0	0	3	0	0	1	2	2	2	1	2	7	3	8	3	14	9	10	7	16	7	16	8	18	11	17	24	28	24	23	20	26	16	21	11	31	25	31	37
Caerphilly	0	0	0	0	0	0	0	0	0	1	2	4	4	3	5	8	5	4	6	4	9	11	9	9	21	9	16	12	13	28	21	22	25	19	20	7	23	17	23	20	14	12	13	7	12	12	24	12	23
Calderdale	0	0	0	0	0	0	0	0	0	1	2	0	0	0	0	2	0	0	0	0	2	0	2	1	4	6	6	5	9	12	5	6	11	12	8	3	10	7	10	6	12	3	8	6	8	19	11	14	6
Cambridge	0	0	0	0	0	0	0	0	0	1	1	2	0	0	1	0	0	1	1	3	1	1	2	4	2	3	5	2	1	5	2	3	0	4	5	7	4	8	9	8	6	4	4	3	3	7	7	10	2
Camden	0	2	0	0	0	1	1	2	2	2	10	5	5	1	3	3	4	10	4	6	15	11	14	21	22	29	19	11	6	18	18	19	26	19	23	16	17	20	22	17	9	9	8	13	9	21	11	11	15
Cannock Chase	0	0	1	0	0	0	0	0	0	1	0	0	2	1	0	0	0	0	2	1	1	2	4	2	2	5	9	2	4	5	6	7	11	4	8	4	4	9	3	4	4	6	3	2	3	3	14	4	8
Canterbury	0	0	0	0	0	0	0	0	0	1	0	0	0	1	1	0	0	0	2	0	0	0	10	2	5	6	3	7	6	5	4	11	10	9	4	6	13	9	9	15	9	7	19	23	9	13	20	18	10
Cardiff	0	0	0	1	0	0	0	0	1	1	1	1	0	4	6	7	11	7	15	11	13	11	25	19	29	34	33	39	29	55	59	72	84	64	46	29	77	75	64	79	47	44	40	46	60	45	50	41	37
Carlisle	0	0	2	0	1	0	0	0	1	0	1	0	2	1	0	4	0	2	1	1	0	1	7	9	7	7	11	9	4	13	11	10	12	13	4	2	15	16	27	25	11	5	2	8	16	10	7	6	2
Carmarthenshire	0	0	0	0	0	0	0	0	2	0	1	2	3	0	0	1	0	2	1	2	3	3	10	5	3	9	6	7	8	16	21	13	9	15	16	26	16	17	22	12	15	13	11	20	13	16	17	28	10
Castle Point	0	0	0	0	0	0	0	0	0	0	3	1	0	1	0	0	0	2	1	0	1	0	0	0	2	3	3	4	4	4	5	8	10	4	6	4	8	3	5	6	2	6	4	2	3	2	2	2	5
Central Bedfordshire	0	0	0	0	0	0	0	0	0	2	1	0	3	0	5	0	0	6	4	2	3	6	10	9	6	8	12	10	5	11	19	15	22	14	12	16	20	18	16	17	17	14	18	9	16	16	9	24	14
Ceredigion	0	0	0	0	0	0	0	0	0	0	0	0	1	0	0	0	0	0	0	0	3	2	0	1	2	2	1	1	0	0	3	2	2	1	2	1	1	1	0	0	2	1	2	0	0	1	1	0	0
Charnwood	1	0	0	0	0	0	0	0	0	0	0	0	0	0	0	0	0	0	4	0	1	3	2	5	2	4	5	1	0	2	13	14	6	6	4	4	7	5	4	5	2	10	3	5	5	9	11	6	10
Chelmsford	0	0	0	2	0	1	0	0	2	1	0	4	4	0	0	1	2	1	1	3	0	3	6	3	11	9	16	7	2	12	6	13	5	10	13	10	6	11	10	9	6	5	2	2	10	8	6	8	9
Cheltenham	0	0	0	1	0	0	0	0	0	0	0	0	1	0	0	1	0	4	0	3	1	0	4	5	8	4	5	2	2	12	10	12	15	8	8	14	8	9	10	10	15	7	13	9	9	15	14	4	6
Cherwell	0	0	0	0	0	0	0	0	1	0	1	0	1	0	2	0	1	0	2	2	0	3	8	5	3	3	0	5	5	7	5	10	10	17	12	15	8	21	16	15	5	6	5	10	9	8	6	10	14
Cheshire East	0	0	0	0	0	0	1	0	0	1	1	3	2	3	1	0	4	4	4	1	3	5	2	7	12	11	14	8	13	14	18	32	28	14	19	28	33	28	33	39	29	29	19	32	28	30	42	31	37
Cheshire West and Chester	0	1	0	0	0	0	0	0	0	2	2	1	0	0	2	2	1	2	4	3	2	3	5	4	5	5	17	11	23	16	18	29	26	36	31	32	31	30	28	27	24	16	27	15	22	22	29	31	25
Chesterfield	0	0	1	0	0	0	0	0	0	0	0	0	0	1	1	4	2	3	1	3	4	5	2	0	1	2	3	4	4	5	12	8	1	5	2	1	5	7	9	6	5	1	6	1	2	3	2	3	2
Chichester	0	0	0	0	1	0	0	0	0	0	0	0	0	0	0	0	3	2	5	0	3	2	2	1	1	1	1	1	1	4	3	1	1	11	3	4	2	6	2	4	1	1	6	6	2	5	7	8	3
Chiltern	0	0	0	0	0	0	0	0	1	2	2	4	1	0	0	2	1	3	0	1	4	2	2	2	5	0	6	5	1	7	5	4	12	6	7	1	3	5	1	3	6	5	0	4	5	6	1	8	3
Chorley	0	0	0	0	2	0	0	0	1	0	0	0	1	0	1	1	0	1	1	2	1	0	4	2	5	2	6	0	3	7	8	5	8	9	10	8	10	9	5	9	8	9	6	12	11	16	17	10	20
Colchester	0	0	0	0	0	0	0	0	0	1	0	0	0	1	0	0	1	0	1	2	1	1	4	3	5	6	4	2	7	6	7	6	6	4	8	4	10	3	6	3	4	14	2	21	6	8	10	7	9
Conwy	0	0	0	0	0	0	0	0	0	0	0	1	0	0	0	0	0	0	0	0	0	0	1	1	3	1	0	2	1	1	4	1	4	2	3	2	7	5	7	8	3	10	10	5	7	15	6	13	10
Copeland	0	0	0	0	0	0	0	0	0	0	0	0	0	1	0	1	0	2	0	1	3	3	4	6	2	8	4	5	5	5	6	7	7	7	4	5	12	7	3	7	4	7	4	5	2	9	12	8	4
Corby	0	0	0	0	0	0	0	0	0	0	0	0	0	0	1	0	0	0	0	0	1	0	3	1	3	1	2	1	1	2	5	2	4	4	0	4	3	2	1	3	3	6	1	2	5	1	1	1	1
Cornwall and Isles of Scilly	0	1	0	1	1	2	0	0	1	1	1	0	1	1	1	3	2	5	2	6	3	3	6	3	4	11	15	10	11	11	20	21	17	18	15	11	19	14	16	18	12	13	20	21	10	8	30	19	15
Cotswold	0	0	0	0	0	0	0	0	0	0	2	0	1	0	1	1	1	2	0	1	0	1	1	0	4	3	5	3	1	4	3	3	1	7	1	2	4	5	4	8	6	4	5	4	1	2	4	1	6
County Durham	0	0	0	0	0	0	0	0	1	0	0	0	0	1	1	0	2	2	2	3	3	3	10	6	13	14	14	19	13	20	26	52	36	37	31	26	86	63	54	58	56	52	29	45	39	50	62	55	76
Coventry	0	0	0	0	1	1	0	1	0	0	2	2	0	0	0	6	4	4	5	1	9	6	11	19	16	19	13	18	17	23	29	27	20	23	18	10	26	22	10	25	15	15	22	18	13	22	24	20	15
Craven	0	0	0	0	0	0	0	0	0	1	0	1	0	0	0	1	0	0	1	0	1	0	3	1	1	1	2	3	1	3	4	2	2	4	2	4	3	4	7	4	5	3	4	1	3	9	6	6	1
Crawley	0	0	0	0	0	0	0	0	0	0	1	0	1	1	0	0	1	3	1	2	3	1	3	3	6	2	6	2	1	9	5	8	4	7	5	4	6	8	10	7	4	9	3	6	10	12	5	5	9
Croydon	0	0	0	0	0	0	1	0	1	0	5	8	4	14	7	13	21	15	9	25	25	24	36	27	44	44	42	22	26	56	47	56	82	49	49	35	42	45	58	44	25	23	32	26	51	43	33	34	32
Dacorum	0	0	1	0	0	3	2	0	0	1	1	0	2	0	4	1	0	4	5	4	1	0	12	2	4	4	6	4	2	13	12	7	11	13	4	6	11	9	4	9	10	6	11	8	11	8	10	9	9
Darlington	0	0	0	0	0	1	0	0	0	0	0	1	0	0	0	0	0	0	1	0	0	0	1	2	3	3	2	3	1	9	2	4	6	6	11	2	21	10	20	14	4	9	15	5	7	12	9	8	10
Dartford	0	0	0	0	0	1	0	0	1	0	0	1	0	0	0	0	2	2	3	4	4	5	3	8	9	5	7	5	2	12	20	23	19	14	12	14	26	25	26	13	15	6	11	13	19	14	19	8	8
Daventry	0	0	0	0	0	2	0	0	0	0	2	0	0	0	0	0	0	0	2	1	1	3	3	3	5	1	3	0	2	6	2	2	8	7	4	2	2	3	3	2	2	3	1	2	2	3	3	1	3
Denbighshire	0	0	0	0	0	0	0	0	0	0	0	0	0	0	0	0	0	0	0	0	1	1	1	0	4	2	3	2	1	7	0	6	7	10	0	4	12	15	9	11	14	4	12	7	15	8	9	14	13
Derby	0	0	0	0	0	1	0	0	0	2	2	0	1	1	4	6	3	4	10	3	8	14	17	21	11	8	8	21	20	22	24	29	19	22	18	2	2	20	11	12	12	13	11	6	7	10	12	16	10
Derbyshire Dales	0	0	0	0	0	0	0	0	1	0	2	0	0	0	0	1	1	0	0	0	4	3	3	3	1	3	2	8	2	8	3	5	0	1	2	2	0	3	3	4	2	0	5	3	9	5	3	3	0
Doncaster	0	0	0	0	0	0	0	0	0	2	0	0	0	0	0	2	2	1	4	4	0	8	3	9	11	9	3	19	16	20	14	17	11	16	7	0	1	7	15	24	6	15	10	13	6	21	23	24	28
Dorset	0	0	0	0	0	0	0	0	0	1	1	2	1	2	1	0	2	1	2	3	3	6	4	2	3	9	6	8	7	12	5	15	10	15	7	6	12	9	17	17	12	3	5	4	8	8	4	9	8
Dover	0	0	0	0	0	0	0	0	0	1	0	0	0	2	1	0	0	1	1	1	0	0	3	1	3	5	1	1	4	2	5	9	5	5	3	3	10	2	9	4	6	6	10	13	5	8	16	19	7
Dudley	0	0	0	0	0	0	1	0	2	1	0	4	1	2	4	3	2	6	9	11	6	9	17	13	17	24	14	16	24	28	22	18	30	16	27	21	25	15	14	11	27	19	9	15	7	25	44	26	49
Ealing	0	1	1	1	1	0	1	1	0	5	10	3	3	2	8	14	9	18	18	16	12	18	29	33	36	29	35	20	25	30	40	25	42	32	26	14	30	44	36	29	46	26	28	35	26	44	27	22	19
East Cambridgeshire	0	0	0	0	0	0	0	0	0	0	0	0	0	0	0	0	0	0	0	1	0	0	0	2	1	3	3	0	1	6	4	2	3	1	2	4	5	3	5	2	0	2	2	1	1	0	5	3	0
East Devon	0	1	4	1	0	1	1	0	0	0	0	0	3	1	0	2	0	0	0	0	0	0	1	1	4	4	3	2	3	0	3	3	6	6	1	4	1	5	3	5	10	6	6	4	3	2	1	5	3
East Hampshire	0	0	0	0	0	1	0	0	0	0	0	3	3	0	0	2	0	1	1	4	3	3	4	1	3	5	5	4	4	4	7	2	3	5	3	6	5	15	6	2	7	5	8	10	8	8	10	10	6
East Hertfordshire	1	0	2	0	0	0	0	0	0	1	2	1	0	1	0	1	0	1	3	0	2	0	3	12	5	2	9	2	5	7	3	7	11	8	3	2	8	8	10	5	11	4	5	8	9	4	4	11	8
East Lindsey	0	0	0	0	0	0	0	0	0	0	1	0	0	0	0	0	0	0	0	1	0	1	0	2	0	4	2	4	1	2	3	9	5	6	3	2	3	5	2	4	5	1	9	8	4	4	7	5	4
East Northamptonshire	0	0	0	0	0	0	0	0	2	0	0	1	0	0	0	0	1	0	1	1	1	2	3	3	2	1	5	5	2	6	5	11	5	2	7	2	3	3	2	3	5	1	1	2	2	1	2	3	2
East Riding of Yorkshire	0	0	0	0	0	0	0	0	0	2	2	2	4	0	0	2	1	1	2	0	0	2	5	2	6	3	3	3	10	12	15	9	7	12	13	10	20	20	20	9	22	6	16	17	27	26	20	13	13
East Staffordshire	0	0	0	0	0	0	0	0	1	0	0	3	0	0	3	2	1	2	2	1	3	4	4	4	5	5	2	5	7	8	5	5	4	9	15	2	0	14	9	3	8	7	5	5	8	12	7	9	10
East Suffolk	0	0	0	0	0	0	1	0	0	0	1	2	1	1	2	1	1	0	0	3	4	3	10	4	3	10	6	3	8	10	7	17	7	7	5	12	10	10	20	16	14	9	7	9	4	15	23	17	26
Eastbourne	0	0	0	0	0	0	0	0	0	0	2	0	0	0	0	0	2	1	1	1	0	1	0	3	0	3	3	2	1	2	4	5	4	0	1	3	1	7	6	9	2	2	1	2	2	4	8	5	7
Eastleigh	0	0	0	0	0	0	0	0	1	1	0	0	1	1	1	1	0	1	2	1	3	6	4	1	4	2	6	6	4	7	4	2	5	6	7	5	9	5	6	8	5	6	5	3	2	5	6	14	5
Eden	0	0	0	0	0	0	0	0	0	0	0	0	1	0	1	0	0	1	2	0	0	3	1	2	2	3	3	1	0	2	5	3	6	2	1	1	2	2	1	3	1	1	0	2	3	3	1	0	3
Elmbridge	0	0	0	0	0	0	0	1	0	0	1	4	1	1	1	0	1	12	4	2	1	4	8	8	6	7	8	6	7	14	9	14	9	4	6	4	10	8	3	4	2	6	8	7	4	9	5	6	5
Enfield	0	0	0	0	0	1	0	1	1	5	2	6	4	7	2	2	12	7	15	20	8	18	22	24	21	16	16	20	9	25	26	27	29	26	20	14	34	32	31	30	24	22	22	14	37	15	22	36	17
Epping Forest	0	0	0	0	0	0	0	0	0	0	0	1	2	0	3	1	3	3	2	4	3	6	3	6	14	9	11	12	10	8	15	17	18	12	11	7	17	20	11	7	10	5	12	13	7	11	9	10	6
Epsom and Ewell	0	0	0	0	0	0	0	0	0	2	0	0	0	0	1	1	0	2	0	0	3	4	7	4	3	4	6	6	7	8	6	16	10	3	2	6	14	6	9	7	6	6	9	4	7	13	4	10	4
Erewash	0	0	0	0	0	1	0	0	0	0	1	0	2	1	2	3	1	2	1	3	5	2	6	5	5	0	4	6	8	5	6	3	3	5	4	1	1	2	1	2	0	3	4	4	1	2	1	3	8
Exeter	0	1	0	1	0	0	0	0	0	0	0	0	1	1	0	2	0	0	0	2	0	0	2	0	3	2	2	4	2	5	4	9	4	5	4	3	5	11	2	8	5	4	9	7	2	5	5	5	6
Fareham	0	0	0	0	0	0	0	0	0	0	1	1	1	0	3	3	2	4	1	1	3	3	4	5	4	3	5	9	1	11	5	4	7	5	3	5	1	3	4	3	2	1	4	4	4	6	4	6	3
Fenland	0	0	0	0	1	0	0	0	0	0	0	1	1	0	0	0	0	1	1	0	1	1	1	3	2	0	2	2	3	5	0	2	9	6	2	6	2	4	4	4	10	4	8	3	6	2	5	2	3
Flintshire	0	0	0	0	0	0	0	0	0	1	0	0	0	0	0	0	0	0	0	0	2	1	0	2	4	5	3	1	2	10	8	7	8	6	6	2	9	14	10	9	7	9	5	3	12	9	9	10	5
Folkestone and Hythe	0	0	0	0	0	0	0	0	1	1	0	1	1	0	1	0	0	1	1	1	0	0	4	1	1	1	3	1	5	4	5	9	2	2	4	2	6	6	3	7	4	2	9	6	2	15	18	9	8
Forest of Dean	0	0	0	0	0	0	0	0	0	0	0	0	0	0	0	0	0	2	0	0	1	1	0	3	1	1	0	5	0	3	5	7	0	3	6	8	5	6	3	4	4	0	3	1	2	0	6	5	2
Fylde	0	0	0	0	0	0	0	0	0	0	2	0	2	0	0	0	0	0	0	2	0	2	1	2	1	1	1	2	2	1	3	5	4	3	7	4	9	6	4	4	3	3	4	6	6	7	7	9	7
Gateshead	0	0	0	0	0	0	0	0	0	0	0	1	0	0	0	0	1	0	0	1	2	0	5	7	1	10	4	13	8	30	19	33	23	19	31	20	42	44	42	36	33	26	20	20	25	28	26	30	36
Gedling	0	0	0	0	0	0	0	0	0	0	3	0	1	2	0	0	1	3	4	3	2	2	4	5	6	6	3	4	3	6	6	5	9	3	6	5	5	6	3	10	0	3	6	8	12	9	7	8	3
Gloucester	0	0	0	0	0	0	0	1	0	0	0	0	0	0	0	1	2	0	1	1	4	4	0	2	2	4	4	7	3	6	9	6	6	4	18	0	10	10	18	7	14	11	6	13	11	11	18	12	12
Gosport	0	0	0	0	0	0	0	0	0	0	0	0	1	1	2	1	1	3	1	4	1	2	2	5	2	1	0	4	2	2	2	7	5	2	0	1	4	4	6	4	2	2	1	1	0	2	2	11	3
Gravesham	0	0	0	0	0	0	0	0	0	0	0	0	0	1	0	2	0	0	1	1	0	1	1	2	4	8	13	2	6	1	7	11	6	11	10	6	12	19	5	4	7	6	8	6	5	14	7	10	4
Great Yarmouth	0	0	0	0	0	0	0	0	0	0	0	0	0	0	0	1	0	2	1	0	1	0	2	2	3	8	3	7	5	3	2	2	2	4	6	9	14	11	7	10	7	6	10	7	3	13	12	8	2
Greenwich	0	0	0	0	0	0	1	0	0	3	4	6	5	2	6	5	14	12	6	14	18	6	13	17	17	10	18	16	11	16	31	32	27	26	15	26	37	20	26	21	19	16	15	11	31	16	13	12	10
Guildford	0	0	2	0	0	0	0	1	0	0	1	3	2	0	0	5	3	2	5	3	2	2	3	1	4	0	2	3	5	14	4	7	8	7	18	11	13	20	11	4	13	6	13	15	21	16	11	12	3
Gwynedd	0	0	0	0	0	0	0	0	0	0	0	0	0	0	0	1	0	2	1	0	0	0	0	2	2	2	1	3	1	1	2	0	1	6	4	0	6	7	5	14	6	9	7	27	12	6	12	7	17
Hackney and City of London	0	0	0	0	0	0	0	1	1	1	8	6	4	5	2	6	6	7	6	14	5	15	20	20	16	24	17	12	15	20	32	34	38	28	26	22	25	29	19	18	16	15	11	9	7	12	6	10	6
Halton	0	0	0	0	0	0	0	0	0	0	0	2	1	1	0	1	2	1	0	1	0	0	0	5	3	2	7	9	2	12	9	7	14	18	10	15	23	12	14	15	12	11	4	8	10	14	13	10	16
Hambleton	0	0	1	0	0	0	0	0	0	0	0	1	0	0	0	2	0	1	0	1	1	0	1	2	3	1	5	2	4	8	3	6	6	6	5	4	10	11	1	4	8	2	3	6	2	4	6	3	5
Hammersmith and Fulham	0	0	0	1	0	2	0	0	3	3	11	1	3	2	3	3	8	9	3	8	11	14	13	14	19	24	8	12	7	12	19	27	20	20	16	10	16	22	19	10	17	4	7	9	9	30	25	17	4
Harborough	0	0	0	0	0	1	0	0	3	0	0	0	0	0	0	0	0	1	3	1	1	3	2	2	2	2	0	1	1	0	8	3	3	3	2	0	3	2	5	4	5	2	6	1	4	2	3	2	3
Haringey	0	0	0	0	0	0	0	1	2	3	6	7	8	1	4	2	4	13	10	11	11	11	15	19	12	10	19	16	16	20	18	23	28	27	17	9	14	30	15	20	11	10	12	17	10	14	5	7	4
Harlow	0	0	0	0	0	0	0	0	0	0	0	1	1	0	1	0	0	0	0	2	1	2	5	6	3	6	8	10	3	10	7	13	13	12	4	4	11	10	8	8	10	3	1	11	7	10	12	6	3
Harrogate	0	0	0	0	0	0	0	0	0	0	0	1	0	1	0	0	0	2	1	5	2	0	3	1	6	3	3	1	6	6	3	10	3	9	7	5	3	8	6	7	5	4	5	5	4	9	8	7	11
Harrow	0	0	1	0	0	0	0	0	5	1	5	7	4	9	6	12	14	23	11	14	18	15	19	25	29	29	40	27	23	27	27	23	31	23	26	26	26	29	26	30	27	15	15	23	17	17	23	27	15
Hart	0	0	0	0	0	0	0	0	0	0	0	1	0	1	0	1	1	0	1	0	1	1	1	2	3	5	4	6	4	7	7	3	1	3	3	4	0	10	7	3	3	2	4	6	9	10	5	5	3
Hartlepool	0	0	0	0	0	0	0	0	0	0	0	0	0	0	0	1	0	1	0	1	0	0	0	0	2	1	2	3	1	5	3	3	2	6	6	3	9	11	6	9	4	4	6	4	8	9	10	4	26
Hastings	0	0	0	0	0	0	0	0	0	0	0	0	0	0	0	1	0	0	0	0	0	0	0	1	0	2	2	1	4	0	0	3	2	2	1	1	4	2	2	1	0	1	2	3	2	0	0	1	3
Havant	0	0	0	0	0	0	0	0	0	0	2	0	2	0	1	3	1	2	3	1	4	6	1	3	4	4	3	5	1	5	5	9	8	8	4	7	4	13	6	3	4	2	3	3	2	9	5	5	5
Havering	0	0	0	0	0	1	0	0	1	0	2	1	1	2	5	2	3	10	7	4	6	13	10	16	13	11	10	6	9	17	27	30	32	37	21	23	28	37	35	26	26	18	24	17	15	21	22	10	11
Herefordshire, County of	0	0	0	0	0	1	0	0	0	0	0	0	1	1	3	0	1	0	0	5	0	3	6	3	0	1	2	4	4	5	9	6	5	5	4	4	11	3	5	5	6	6	8	7	5	3	5	7	11
Hertsmere	0	0	1	1	0	0	0	0	0	0	1	0	2	1	2	3	0	6	5	3	2	6	9	10	11	10	10	8	8	15	16	11	19	14	6	9	11	15	17	13	11	4	9	10	0	8	11	11	7
High Peak	0	2	0	0	0	0	0	0	0	1	1	0	0	0	1	1	0	0	0	1	0	0	3	0	3	2	1	3	1	4	4	4	5	3	6	3	9	5	6	5	3	5	2	6	3	9	13	7	9
Hillingdon	0	1	0	1	2	0	0	2	0	2	2	4	3	1	5	9	16	5	13	11	9	10	17	18	17	20	26	11	18	19	32	22	18	44	17	16	22	27	18	32	22	17	12	17	17	22	19	33	21
Hinckley and Bosworth	0	0	0	0	0	0	0	0	0	0	1	0	0	0	0	0	1	2	2	2	1	5	2	4	2	3	7	4	1	3	3	5	1	6	6	6	4	10	0	9	8	3	5	6	7	2	14	10	9
Horsham	0	0	0	0	0	0	0	0	2	0	0	1	0	2	1	1	3	1	0	2	3	1	1	3	4	10	3	4	3	9	8	4	6	12	3	5	7	7	7	7	0	5	6	4	12	9	12	7	8
Hounslow	1	1	1	0	0	0	0	0	0	2	6	1	5	4	5	9	8	11	13	7	14	8	17	15	17	15	27	8	15	24	22	32	33	25	17	19	17	25	23	24	16	9	13	9	20	17	16	18	14
Huntingdonshire	0	0	0	0	0	0	0	0	0	0	0	0	1	0	0	1	0	4	0	2	5	1	4	3	6	3	5	2	3	6	6	3	4	6	5	3	4	7	8	11	8	3	2	6	3	2	9	9	5
Hyndburn	0	0	0	0	0	0	0	0	0	0	0	1	0	0	1	0	0	1	0	0	0	0	0	0	1	1	2	2	1	4	2	2	8	2	3	4	9	4	3	10	3	3	3	3	0	2	4	3	5
Ipswich	0	0	0	0	0	0	0	0	0	2	0	0	0	0	0	0	1	1	0	0	2	2	2	3	1	5	7	1	2	4	7	4	5	8	3	10	10	8	8	5	10	13	14	4	8	11	8	9	24
Isle of Anglesey	0	0	0	0	0	0	0	0	0	0	1	0	0	1	0	0	0	0	0	0	0	0	0	0	0	0	0	0	0	6	3	0	1	1	2	0	3	2	2	5	0	3	2	4	4	4	1	4	2
Isle of Wight	0	0	0	1	0	0	0	0	0	1	0	0	0	0	0	0	0	0	0	1	1	4	2	0	1	1	1	2	0	3	1	8	1	1	3	2	4	2	5	2	5	3	2	1	0	4	8	1	4
Islington	0	0	0	0	0	0	0	1	0	2	2	10	6	5	6	5	7	8	9	3	9	8	24	19	11	8	15	7	12	17	19	17	21	15	17	5	8	14	12	12	4	4	7	7	7	11	7	12	4
Kensington and Chelsea	0	4	0	4	6	0	1	2	4	10	10	6	3	4	1	6	7	8	5	5	5	6	9	8	14	24	20	9	9	23	19	16	21	14	7	6	11	19	20	18	11	4	3	7	7	6	9	8	6
Kettering	0	0	0	0	0	0	1	0	0	0	1	1	1	0	0	0	1	0	1	4	0	2	3	2	0	2	1	5	2	10	17	11	3	11	3	7	2	6	1	2	1	3	5	2	5	2	5	4	7
King's Lynn and West Norfolk	0	0	0	0	0	0	0	0	0	0	1	0	0	1	1	1	3	1	1	0	1	0	1	1	3	7	6	4	4	4	5	6	7	10	4	4	15	14	18	20	16	21	20	15	28	21	22	30	23
Kingston upon Hull, City of	1	0	0	0	0	0	0	0	0	0	0	0	0	0	0	0	0	0	0	0	3	0	0	1	3	3	2	0	3	3	2	5	8	10	8	4	14	12	9	13	17	14	10	15	28	31	10	14	24
Kingston upon Thames	0	0	0	0	0	0	0	1	0	0	1	1	1	3	2	5	6	2	6	6	1	1	11	16	13	13	11	6	13	19	12	9	16	20	11	9	13	18	21	19	10	4	23	13	19	17	20	22	20
Kirklees	0	0	0	0	0	0	0	0	1	1	1	0	0	0	1	2	1	5	2	4	3	3	4	6	10	11	10	9	15	19	19	24	22	21	14	12	29	26	21	17	14	17	7	22	25	24	26	18	25
Knowsley	0	0	0	0	0	0	0	0	0	0	0	1	0	0	2	0	0	2	0	1	3	2	1	4	9	6	7	10	12	21	14	18	22	22	17	15	32	15	19	29	12	16	8	18	8	25	26	26	12
Lambeth	0	0	1	1	0	1	2	0	2	8	14	4	11	10	13	16	21	17	22	30	18	33	28	25	36	42	34	37	27	54	42	49	42	40	32	18	42	40	31	34	17	47	17	17	11	24	21	12	17
Lancaster	0	0	0	0	0	0	0	0	0	0	0	0	0	0	0	5	1	5	8	2	7	9	11	18	16	41	14	17	11	35	28	28	19	34	18	34	27	30	28	23	12	21	7	18	21	12	13	12	9
Leeds	0	0	0	1	0	0	2	0	3	0	3	1	0	0	2	1	3	4	6	7	6	11	18	18	11	20	21	25	21	27	24	31	30	37	17	36	50	65	44	44	47	41	40	28	38	78	95	65	53
Leicester	0	0	0	0	0	0	0	0	0	0	1	1	1	0	0	2	3	5	6	2	5	7	11	20	5	13	8	11	1	5	27	33	24	26	15	20	25	25	20	32	20	17	24	10	14	14	10	12	18
Lewes	0	0	0	0	0	0	0	0	0	0	0	1	0	0	0	0	2	0	1	0	3	1	2	1	5	2	2	3	2	5	8	3	4	6	11	3	4	6	3	8	6	3	3	3	1	5	7	10	8
Lewisham	0	0	0	1	0	0	1	0	0	1	5	9	3	2	6	11	8	9	16	22	8	19	28	15	25	25	35	21	26	28	38	37	55	51	29	32	46	30	29	33	13	14	19	29	16	25	17	29	6
Lichfield	0	1	0	0	1	0	0	0	0	0	0	0	0	0	2	4	1	1	3	1	1	1	6	2	10	7	2	4	9	9	9	9	10	10	6	3	7	7	8	4	5	4	8	7	8	8	7	5	9
Lincoln	0	0	0	0	0	0	0	0	0	0	0	0	0	0	0	0	1	2	1	0	0	0	0	0	2	4	1	5	2	4	4	3	0	7	0	0	7	5	4	6	0	3	2	2	5	0	7	3	0
Liverpool	0	1	2	0	0	1	2	0	0	1	0	3	4	2	1	3	4	9	6	10	14	13	18	26	24	34	27	27	36	43	41	48	55	60	48	46	51	67	76	66	34	40	35	37	31	43	54	36	46
Luton	0	0	0	2	0	0	0	0	0	0	0	0	1	0	0	0	5	6	4	9	3	5	7	15	11	9	12	10	10	16	26	17	23	19	14	27	28	30	35	16	22	16	23	15	24	8	5	25	35
Maidstone	0	0	0	0	0	0	0	0	0	0	1	0	0	0	0	2	0	2	0	0	0	3	3	5	8	8	4	4	7	1	11	10	6	8	2	11	12	9	7	20	8	7	3	15	14	14	10	23	12
Maldon	0	0	0	0	0	0	0	0	0	0	0	0	0	0	1	0	0	0	1	0	2	3	4	1	3	1	1	0	2	8	5	1	2	2	1	0	2	6	3	3	2	1	1	2	4	1	2	2	6
Malvern Hills	0	0	0	0	0	0	0	0	0	0	0	2	0	0	0	0	0	0	0	2	0	0	0	2	3	2	4	3	2	8	2	5	6	7	2	3	6	5	4	5	6	2	2	2	9	4	6	5	6
Manchester	0	0	1	1	2	0	0	0	2	1	1	0	7	0	3	6	4	3	4	4	3	4	12	9	14	22	14	31	23	24	33	29	34	30	40	36	72	59	53	63	37	43	38	40	51	38	35	15	55
Mansfield	0	0	0	0	0	0	0	0	0	0	1	0	0	1	2	1	0	0	2	0	2	0	0	3	1	7	7	3	5	7	7	2	4	4	3	1	8	4	1	5	1	0	5	1	0	2	4	5	1
Medway	0	0	0	2	0	0	0	0	0	0	4	1	3	0	2	1	2	1	3	2	10	3	11	16	9	11	9	9	9	10	17	33	24	16	23	19	30	36	23	20	25	18	13	12	15	16	17	27	17
Melton	0	0	0	0	0	0	0	0	0	0	0	1	1	0	0	0	0	0	1	0	1	1	4	1	0	1	0	3	0	2	6	5	0	0	2	2	3	0	1	1	2	1	1	1	2	3	0	1	1
Mendip	0	0	0	0	0	1	0	0	0	0	0	0	0	1	0	0	0	0	0	0	0	0	0	1	1	0	3	1	1	0	0	2	1	0	0	2	2	0	1	1	1	4	2	1	0	0	4	4	2
Merthyr Tydfil	0	0	0	0	0	0	0	0	0	0	0	0	0	0	0	2	0	0	1	0	1	0	1	2	6	5	5	2	5	9	3	10	6	7	3	8	12	14	10	9	4	4	7	2	6	18	15	14	5
Merton	0	0	0	0	0	2	0	0	1	6	7	3	7	6	1	6	10	13	11	9	7	8	15	22	24	14	24	14	13	23	27	27	33	23	15	17	37	17	16	22	15	18	13	21	13	14	13	21	9
Mid Devon	0	0	0	1	0	0	0	0	0	0	0	1	0	0	0	0	0	0	0	1	0	0	1	1	2	0	1	0	0	0	2	4	2	2	17	4	1	4	4	0	5	1	4	3	2	4	3	1	1
Mid Suffolk	0	0	0	0	0	0	0	0	0	0	0	1	0	0	1	0	0	1	0	0	1	1	1	0	0	0	1	0	4	3	5	2	1	7	4	3	3	4	1	3	3	2	2	3	4	4	4	2	1
Mid Sussex	0	0	0	0	0	0	0	0	0	0	1	0	2	1	0	2	1	1	2	3	0	3	6	8	7	2	4	3	3	7	10	7	5	13	11	7	12	13	10	10	13	4	4	10	5	7	12	10	14
Middlesbrough	0	0	0	0	0	0	0	0	0	0	0	0	0	1	0	0	0	1	0	2	1	2	1	2	7	7	7	10	14	17	15	23	12	26	21	21	17	25	5	18	17	15	14	19	20	16	13	20	28
Milton Keynes	0	0	1	0	0	1	0	0	0	0	0	1	0	1	1	0	3	12	6	2	4	2	23	14	10	7	10	10	10	14	17	14	12	12	10	21	19	19	12	13	17	14	7	15	16	12	16	13	5
Mole Valley	0	0	0	0	0	0	0	0	0	1	2	3	0	4	1	0	2	3	2	2	2	1	4	8	6	1	3	3	2	11	7	8	6	8	5	3	12	12	10	14	3	3	6	12	6	11	6	11	2
Monmouthshire	0	0	0	0	0	0	0	0	0	0	1	2	1	2	1	2	4	5	9	4	5	4	9	3	7	5	3	7	5	11	3	6	6	7	10	6	10	5	13	14	8	3	3	6	5	6	6	5	2
Neath Port Talbot	0	0	0	0	0	0	1	0	0	7	3	2	1	0	1	0	1	1	1	2	3	3	1	1	1	6	14	6	6	22	14	8	13	17	16	20	9	23	19	14	23	9	17	16	15	25	25	19	15
New Forest	0	0	0	0	0	0	0	0	0	1	0	0	1	0	0	0	0	0	1	3	4	2	2	3	2	1	9	3	1	6	9	9	7	8	8	4	13	9	9	9	9	3	5	6	3	8	7	14	4
Newark and Sherwood	0	0	2	0	0	2	1	0	0	0	2	0	1	0	0	1	0	2	0	1	0	0	1	0	1	4	1	6	3	3	6	7	13	5	5	1	2	3	3	7	5	0	4	6	3	4	3	7	5
Newcastle upon Tyne	0	0	0	1	0	0	0	0	0	0	0	0	0	0	0	0	0	2	0	1	2	0	2	4	6	2	7	2	1	2	4	6	8	8	2	10	9	5	5	9	9	5	8	6	9	15	6	5	12
Newcastle-under-Lyme	0	1	0	1	1	0	1	0	0	1	0	0	2	2	4	0	6	3	5	8	9	5	17	20	19	19	20	12	30	19	33	41	31	32	23	24	39	39	30	41	29	20	17	20	31	26	32	29	36
Newham	0	0	0	0	0	0	0	0	1	1	3	2	3	4	7	9	5	12	6	14	6	14	24	11	33	38	38	35	21	38	44	40	34	60	46	26	45	44	38	40	24	30	15	20	17	17	16	16	9
Newport	0	0	0	0	0	0	0	1	0	0	1	0	3	3	13	11	11	6	8	18	16	15	26	22	37	24	15	25	22	32	27	34	28	22	16	4	15	23	25	17	18	10	7	9	13	9	11	10	9
North Devon	0	0	0	0	0	0	0	0	0	0	0	0	0	0	0	0	0	0	0	0	0	0	0	0	0	0	0	0	0	0	1	2	2	0	4	6	1	1	0	1	5	2	2	0	4	2	3	8	3
North East Derbyshire	0	0	0	0	0	0	0	1	1	1	1	0	2	2	1	3	2	1	1	2	2	2	7	5	4	4	4	6	5	4	7	13	4	6	4	0	3	6	5	1	5	6	5	8	9	8	8	10	6
North East Lincolnshire	0	0	0	0	0	0	0	0	0	0	0	0	0	0	0	0	0	1	0	1	1	1	2	4	5	3	3	1	3	4	2	5	1	10	3	2	6	3	4	4	4	5	2	4	6	0	1	9	2
North Hertfordshire	0	0	0	0	0	0	0	0	0	0	0	0	1	0	1	1	0	1	1	1	1	0	2	2	5	4	4	1	8	9	7	5	1	6	2	7	6	4	6	7	5	1	2	1	4	5	4	9	3
North Kesteven	0	0	0	0	0	0	0	0	1	1	1	0	0	0	0	0	1	0	0	1	1	1	4	4	1	5	8	6	6	7	4	6	2	8	5	6	7	2	1	2	2	2	1	1	4	1	3	3	1
North Lincolnshire	0	0	0	0	0	1	0	0	0	0	0	0	0	0	0	1	0	0	2	1	0	0	1	1	3	3	2	2	6	3	7	8	4	13	4	0	7	5	10	17	3	16	8	7	16	17	12	19	12
North Norfolk	0	0	0	0	0	0	0	0	0	0	0	0	2	0	0	1	0	1	0	1	1	0	1	2	2	0	2	3	3	3	2	3	3	4	2	3	6	2	4	2	2	1	1	4	3	3	1	4	0
North Somerset	0	0	0	0	0	0	0	0	1	0	0	1	1	0	1	0	1	0	0	2	1	0	0	1	7	3	6	2	4	8	4	8	7	8	6	4	6	3	5	11	4	6	1	5	5	9	3	18	6
North Tyneside	0	0	0	0	1	0	0	0	1	0	0	0	3	1	0	1	1	4	3	3	0	2	4	4	4	6	11	17	7	3	19	35	14	13	24	19	32	26	18	16	8	16	7	15	13	16	21	24	21
North Warwickshire	0	0	0	1	0	0	0	0	0	0	0	1	1	0	2	1	0	1	1	3	2	1	6	5	1	2	1	5	9	2	3	5	11	3	5	3	5	2	4	2	4	2	1	3	6	6	18	2	11
North West Leicestershire	0	0	0	0	0	0	0	0	0	0	2	0	1	1	0	0	2	4	3	0	2	3	3	2	5	1	1	2	1	5	6	5	4	2	4	9	1	5	5	7	4	3	3	4	4	6	9	2	6
Northampton	0	0	1	0	1	0	0	0	0	0	0	0	1	1	0	1	0	0	4	1	2	5	2	5	18	9	5	5	10	15	10	16	18	19	20	12	22	12	20	17	9	15	10	9	15	15	11	12	14
Northumberland	0	0	0	0	0	0	0	0	0	0	0	0	1	0	2	1	2	1	2	1	0	3	7	8	8	12	7	10	6	7	17	40	25	23	25	23	28	31	35	36	24	39	37	31	37	25	46	39	52
Norwich	0	0	0	0	0	0	0	0	0	0	0	1	1	0	0	1	1	2	0	0	1	1	1	1	0	0	1	2	2	2	2	3	8	6	5	5	0	7	12	5	10	3	2	3	3	3	3	5	2
Nottingham	0	0	0	0	1	0	1	0	1	3	0	3	4	1	2	1	5	2	4	7	5	9	5	6	9	16	9	4	7	11	15	16	20	16	15	11	20	23	16	11	13	12	18	16	12	16	24	30	9
Nuneaton and Bedworth	0	1	0	0	2	0	0	0	1	1	2	1	1	1	0	3	2	4	1	1	5	1	11	9	6	9	7	7	3	10	4	7	15	9	13	3	11	13	10	8	6	10	8	11	5	13	11	9	10
Oadby and Wigston	0	0	0	0	0	0	1	0	0	0	0	0	0	0	0	0	1	3	2	0	1	3	2	6	2	1	0	1	0	2	4	5	3	3	2	7	5	0	1	2	2	2	0	1	1	7	11	6	3
Oldham	0	1	0	0	1	0	2	0	0	2	0	1	2	1	0	4	1	2	5	3	10	5	6	12	13	14	11	13	10	18	13	22	23	20	13	13	34	42	31	36	48	34	22	16	18	27	31	21	31
Oxford	0	1	0	0	0	1	0	1	0	6	2	1	1	0	1	2	2	4	5	1	2	3	2	3	1	4	7	5	4	13	18	13	22	26	13	12	22	31	21	19	30	8	11	11	21	12	14	11	12
Pembrokeshire	0	0	0	0	0	0	0	0	0	0	0	1	0	0	0	0	0	0	0	0	2	2	3	0	4	3	3	2	1	5	4	3	6	9	4	10	13	6	4	13	15	14	1	3	5	9	7	9	3
Pendle	0	0	0	0	0	0	0	0	0	0	0	0	0	0	0	0	0	2	0	0	0	1	2	7	0	2	3	4	2	5	3	6	4	5	6	3	7	3	7	4	4	4	3	5	3	6	7	6	5
Peterborough	0	0	0	0	0	0	0	0	0	0	0	0	0	2	0	0	0	1	1	5	3	4	3	2	1	4	6	5	3	6	4	6	5	10	4	6	8	9	7	2	4	4	9	8	4	5	12	12	2
Plymouth	0	0	0	0	0	0	0	0	0	1	0	0	2	0	3	1	0	3	2	2	2	0	3	7	3	9	3	3	5	7	2	8	12	14	10	1	5	8	4	9	13	1	7	12	16	11	10	16	7
Portsmouth	0	0	0	0	0	0	0	0	1	0	0	1	1	3	3	5	3	3	4	3	1	8	9	6	14	5	3	5	2	4	1	6	5	10	6	10	10	8	12	10	9	13	7	4	11	12	6	9	5
Powys	0	0	0	0	0	0	0	0	0	2	1	2	4	0	0	0	0	0	0	2	0	0	2	3	2	2	1	1	3	10	4	6	2	1	7	5	5	4	4	11	8	3	2	10	8	6	2	3	15
Preston	0	0	0	0	0	0	0	0	0	0	0	1	0	0	0	0	2	0	1	0	1	3	2	1	1	2	4	7	7	10	14	10	9	16	7	8	8	6	10	13	15	15	9	11	12	13	10	13	11
Reading	0	0	0	0	0	0	0	1	0	1	0	1	0	3	2	1	2	4	1	1	3	2	4	2	8	7	3	10	11	10	5	14	10	9	14	8	5	13	13	15	14	9	26	27	37	24	29	20	7
Redbridge	0	1	0	0	0	0	1	0	0	0	0	0	3	3	5	6	8	12	12	5	10	12	19	12	15	15	21	15	20	24	28	22	30	21	27	23	26	54	34	33	11	14	28	21	14	12	16	20	7
Redcar and Cleveland	0	0	0	0	0	0	0	0	0	1	0	0	0	0	0	0	1	0	1	0	1	3	2	2	3	6	10	11	7	7	8	11	7	16	13	8	9	12	0	9	9	16	8	14	4	8	6	7	11
Redditch	0	0	0	0	0	0	0	0	0	0	0	1	0	0	2	0	0	1	0	1	3	2	1	2	5	2	2	4	6	9	7	3	4	4	0	4	5	7	4	12	8	9	3	8	11	8	12	14	13
Reigate and Banstead	0	0	0	0	0	1	0	0	0	1	1	2	1	1	2	1	1	5	1	4	5	7	14	10	14	9	8	8	7	14	19	14	14	17	8	15	15	18	21	19	17	12	7	20	14	28	18	16	19
Rhondda Cynon Taf	0	0	0	0	0	0	0	0	0	0	0	0	2	0	0	0	0	0	1	6	1	5	6	11	13	17	37	14	16	37	27	40	39	42	32	22	38	45	49	43	32	33	21	31	28	46	57	43	22
Ribble Valley	0	0	0	0	0	0	0	0	0	0	0	1	0	0	0	0	0	0	0	0	0	1	0	0	2	0	0	0	1	1	1	3	4	1	3	5	6	3	3	2	5	0	2	1	4	2	6	4	4
Richmond upon Thames	0	0	0	0	0	2	0	0	0	1	1	1	3	0	2	4	5	5	4	9	2	9	16	14	15	12	19	11	15	12	16	15	7	15	8	7	11	14	9	9	12	6	11	8	9	9	11	7	6
Richmondshire	0	0	0	0	0	0	0	0	0	1	0	0	1	0	0	0	0	0	0	0	0	0	1	1	0	1	4	1	0	2	0	2	1	2	2	1	3	1	3	2	2	3	1	7	1	3	3	1	2
Rochdale	0	0	0	0	0	0	0	0	1	1	1	0	1	0	1	3	5	1	1	3	6	1	10	7	8	15	11	13	8	11	18	16	9	16	17	11	17	28	36	23	18	16	16	20	25	25	16	16	26
Rochford	0	0	0	0	0	0	0	0	0	0	0	0	0	0	0	0	0	0	0	0	1	1	1	1	7	3	3	3	5	1	5	6	10	7	6	3	7	4	2	3	3	3	2	3	2	0	2	4	2
Rossendale	0	0	0	0	0	0	0	0	0	0	0	0	0	0	0	0	0	0	0	1	0	0	3	0	2	1	0	1	2	5	2	2	3	5	3	1	0	6	5	2	2	7	2	7	2	5	7	5	10
Rother	0	0	0	0	0	0	0	0	0	0	0	0	0	0	0	0	1	0	2	0	0	1	0	1	2	2	2	1	3	2	3	6	1	2	4	1	6	3	2	0	2	2	0	3	1	0	1	2	2
Rotherham	0	1	0	0	0	0	0	0	2	1	0	0	1	0	0	1	2	3	2	3	4	9	10	12	9	16	10	17	27	27	29	22	15	18	11	9	8	20	21	21	22	11	27	35	20	34	14	22	28
Rugby	0	1	0	1	0	0	0	0	0	1	0	1	1	0	0	0	0	4	0	4	2	1	1	1	3	1	1	4	4	3	1	2	2	11	5	1	6	6	3	7	3	4	5	3	1	1	5	7	14
Runnymede	0	0	0	0	0	0	0	0	1	0	0	2	0	1	1	1	4	3	1	1	1	2	1	0	1	6	6	4	3	8	1	8	3	3	1	1	5	6	7	3	8	6	7	3	7	7	8	9	5
Rushcliffe	0	0	0	0	0	0	0	0	0	0	0	1	2	1	0	1	2	1	1	1	1	0	2	1	4	9	4	2	7	4	7	3	1	12	2	2	3	8	3	5	1	4	1	5	5	3	14	6	7
Rushmoor	0	0	0	0	1	0	0	0	0	0	0	1	0	0	1	0	3	0	2	3	1	1	4	0	3	1	6	5	5	3	8	5	10	4	13	13	18	17	5	7	13	14	20	13	16	14	9	13	16
Rutland	0	0	0	0	0	0	0	0	0	0	0	0	0	0	0	0	0	0	0	0	0	0	1	1	0	1	0	0	1	0	2	0	0	1	0	1	0	1	1	0	1	0	2	1	0	0	1	0	0
Ryedale	0	0	0	0	0	0	0	0	1	0	0	0	0	0	0	0	1	0	0	0	1	2	1	3	1	1	1	1	0	2	0	3	1	3	1	1	3	1	2	4	1	2	1	2	0	1	1	0	1
Salford	0	0	0	0	0	0	0	0	0	1	0	1	2	0	0	5	2	3	7	9	8	7	11	16	6	18	13	18	14	21	29	17	21	12	16	19	33	16	32	25	29	25	21	18	28	26	35	22	36
Sandwell	0	0	0	0	0	0	0	0	0	0	2	4	2	3	4	5	2	7	18	6	7	13	22	17	17	14	19	18	30	35	35	30	37	30	19	25	28	31	31	21	27	11	15	22	17	29	37	21	40
Scarborough	0	0	0	0	0	0	0	0	0	0	0	0	0	0	0	0	0	0	0	2	3	0	4	1	0	4	3	3	2	7	4	8	2	5	9	6	3	4	6	4	4	8	12	5	5	11	6	5	3
Sedgemoor	0	0	0	0	0	0	0	0	0	1	0	1	2	1	1	0	0	1	1	0	1	1	1	1	1	2	2	0	2	4	4	3	3	7	3	2	7	3	8	4	9	3	2	1	2	3	13	3	3
Sefton	0	0	0	0	0	0	0	0	1	0	0	3	0	2	1	0	1	1	4	2	2	4	7	6	18	12	16	12	12	19	33	27	31	45	32	28	36	39	33	33	14	27	21	32	30	40	28	26	40
Selby	0	0	0	0	0	0	0	0	0	0	0	0	0	0	0	0	1	0	1	0	3	0	0	0	1	1	0	2	0	3	5	1	4	3	1	1	4	3	4	1	2	2	1	1	1	7	2	4	3
Sevenoaks	0	0	0	0	0	0	0	0	0	1	1	1	0	0	0	1	0	0	1	0	1	3	1	8	4	4	7	4	2	8	7	4	10	11	5	7	8	4	9	12	6	1	9	6	2	9	3	3	6
Sheffield	1	0	1	1	2	0	3	3	0	6	0	2	4	6	6	14	13	18	26	25	37	44	59	60	48	45	28	65	61	74	108	63	53	43	42	64	63	49	49	51	58	54	37	70	50	78	49	39	67
Shropshire	0	0	0	0	0	0	1	1	1	1	1	3	0	0	0	0	0	4	2	5	2	4	4	10	4	14	10	13	13	9	10	13	9	19	8	7	10	9	18	14	5	8	16	16	15	9	15	21	8
Slough	0	0	0	0	0	1	0	3	1	0	7	6	4	2	4	6	4	1	5	5	2	6	10	8	6	12	10	5	6	10	7	11	4	10	13	5	9	18	9	8	14	12	9	14	17	17	8	12	8
Solihull	0	0	0	0	0	0	0	0	0	0	1	0	0	0	0	2	1	1	5	4	4	3	9	15	16	17	17	30	13	14	17	15	25	20	24	11	13	17	14	19	24	13	7	10	20	20	13	11	21
Somerset West and Taunton	0	0	0	0	0	0	0	0	0	0	2	0	0	0	0	0	0	0	0	1	1	1	2	1	3	3	2	2	0	2	1	2	10	3	0	2	3	0	4	3	5	9	2	8	14	8	9	21	4
South Bucks	0	0	0	0	0	1	0	0	0	1	1	4	1	1	1	4	3	1	3	2	1	7	2	3	4	1	4	6	3	8	5	3	2	2	2	2	3	5	6	1	4	3	3	3	3	4	3	3	3
South Cambridgeshire	0	0	1	0	0	0	0	0	0	2	0	1	3	0	1	0	1	2	5	3	2	2	7	5	6	3	3	3	4	3	8	3	6	0	5	6	4	4	4	7	2	6	2	1	7	3	4	9	4
South Derbyshire	0	0	0	1	0	0	0	0	1	0	0	1	1	0	1	2	2	1	4	1	1	3	7	2	1	4	6	1	3	3	8	12	3	9	7	1	1	9	7	10	8	5	8	4	5	2	7	9	4
South Gloucestershire	0	0	0	0	0	0	0	1	2	0	3	3	3	0	1	0	1	2	1	0	3	3	8	5	13	3	6	8	9	15	12	6	10	11	9	10	10	9	28	13	6	6	4	2	8	19	6	7	9
South Hams	0	0	1	0	0	2	0	0	0	1	1	0	0	0	2	0	0	1	0	0	1	1	0	1	0	5	2	1	2	3	3	4	4	2	5	2	2	0	1	2	1	1	4	1	3	1	0	5	0
South Holland	0	0	1	0	0	0	0	0	0	0	0	1	0	0	1	0	0	1	0	1	1	0	0	0	2	6	2	0	0	4	2	3	0	3	5	3	5	4	1	5	5	3	3	1	4	4	4	1	5
South Kesteven	0	0	1	0	0	0	0	0	0	2	0	1	0	0	1	0	0	1	1	2	0	0	1	4	0	4	3	2	3	4	8	7	2	10	1	6	4	2	0	2	4	5	10	4	3	4	5	6	2
South Lakeland	0	0	0	0	1	0	2	3	0	0	2	5	1	2	0	3	6	11	16	4	10	2	4	15	19	13	19	3	11	6	21	14	19	10	18	16	26	8	12	13	2	5	16	12	8	3	8	10	7
South Norfolk	0	0	0	0	0	0	0	0	0	1	0	0	1	0	0	1	1	1	1	1	0	1	1	4	1	4	4	3	1	2	5	1	2	9	3	1	5	5	6	3	3	5	2	10	7	2	3	2	4
South Northamptonshire	0	0	0	0	0	0	0	0	0	0	1	0	0	1	0	0	2	0	2	0	2	1	1	2	2	4	4	1	2	5	4	6	7	5	4	5	7	0	4	4	5	3	1	1	4	3	4	2	3
South Oxfordshire	0	0	1	0	0	0	0	0	0	0	1	0	0	0	1	0	2	2	4	1	1	1	6	6	7	3	6	3	4	7	8	13	9	11	4	8	14	5	9	13	14	7	9	11	5	5	13	10	6
South Ribble	2	0	0	0	0	0	0	0	0	0	0	1	0	0	0	0	1	0	1	1	0	0	4	0	1	6	4	0	1	7	5	4	7	6	5	1	6	6	8	8	5	11	10	7	7	6	7	5	10
South Somerset	0	0	0	0	0	0	0	0	0	1	0	0	1	0	0	0	0	0	0	2	1	0	1	1	0	2	1	2	1	3	3	1	5	6	3	3	3	7	3	5	1	2	5	4	1	7	5	6	5
South Staffordshire	0	0	0	0	0	0	0	0	0	0	1	0	4	2	2	1	2	4	1	4	6	3	3	4	2	10	11	3	8	8	7	9	5	8	6	6	9	6	9	15	13	3	1	1	7	3	9	7	7
South Tyneside	0	0	0	0	0	0	0	0	0	0	0	0	0	0	1	1	0	1	1	2	2	0	2	5	4	2	7	1	5	14	13	9	13	18	12	15	23	19	19	12	18	12	9	16	27	26	30	26	17
Southampton	0	0	0	1	0	0	0	0	0	2	0	0	2	0	1	2	1	2	3	3	6	4	6	2	6	15	13	10	9	18	18	13	17	10	11	12	9	15	13	23	9	7	10	11	18	8	16	20	15
Southend-on-Sea	0	0	0	1	0	0	0	0	1	0	0	1	0	1	0	2	2	0	0	0	1	4	6	6	2	8	7	6	11	13	15	17	14	19	15	9	19	18	5	6	10	4	8	10	7	6	3	1	1
Southwark	0	1	0	1	1	3	1	2	7	6	11	10	8	10	12	16	19	20	15	23	13	28	43	31	29	32	48	32	34	54	34	59	48	53	38	26	39	50	43	41	35	29	12	25	21	27	22	16	17
Spelthorne	0	0	0	0	0	0	0	0	0	0	0	0	0	0	1	0	1	2	2	3	1	3	3	4	9	4	10	7	5	6	1	7	3	3	3	3	6	7	1	2	2	3	4	6	10	10	5	11	6
St Albans	0	0	1	1	0	0	0	0	2	1	1	0	0	1	2	0	1	0	2	4	3	0	7	5	3	8	6	11	11	13	7	11	18	12	12	11	11	14	10	14	6	10	3	9	9	2	9	6	6
St. Helens	0	0	0	0	0	0	0	0	0	0	1	0	1	0	1	0	0	2	1	4	2	2	4	11	10	12	14	10	20	22	18	29	26	30	28	19	28	31	14	21	12	10	15	9	10	29	37	23	35
Stafford	0	0	0	0	0	0	0	0	0	0	0	0	0	0	0	0	0	0	0	1	1	0	1	2	2	0	0	3	3	6	3	6	8	1	3	5	3	9	9	15	11	4	6	8	3	7	16	10	13
Staffordshire Moorlands	0	0	0	0	0	0	0	0	0	0	0	1	0	1	0	1	0	1	1	1	2	1	3	1	1	7	3	2	1	0	4	6	1	1	0	1	3	3	3	5	6	5	4	7	4	7	6	7	8
Steve0ge	0	0	0	0	0	0	0	0	0	1	1	0	0	0	2	0	0	2	0	0	0	0	1	0	2	2	0	2	8	4	2	5	8	7	9	5	8	9	6	4	4	7	4	5	5	6	6	7	4
Stockport	1	0	0	0	1	0	0	0	0	1	2	1	3	3	0	3	6	6	7	2	6	6	6	10	9	15	8	10	12	23	18	33	28	31	26	26	45	28	30	36	32	27	14	39	21	32	37	21	39
Stockton-on-Tees	0	0	0	0	0	0	0	0	1	2	1	0	0	1	0	1	3	0	1	2	0	0	3	2	2	6	9	10	4	16	8	13	13	16	11	12	9	20	9	18	6	11	10	9	15	11	10	7	13
Stoke-on-Trent	0	0	0	0	0	0	0	0	0	0	0	2	0	1	0	0	1	1	1	1	2	2	4	5	5	5	3	4	17	14	3	17	9	11	6	15	5	11	18	11	24	12	10	15	14	16	10	16	14
Stratford-on-Avon	0	0	0	0	0	0	0	0	0	1	0	1	0	0	1	2	2	4	4	2	0	2	7	3	2	8	7	5	2	13	7	5	9	9	8	11	8	9	7	14	7	10	5	4	5	7	10	8	28
Stroud	0	0	0	0	0	0	0	0	0	0	0	2	0	0	0	1	0	1	0	1	1	1	2	1	4	0	2	3	7	6	2	4	4	8	8	2	5	16	14	7	10	2	7	9	2	6	9	3	6
Sunderland	0	0	0	0	0	0	1	0	0	0	0	0	0	0	2	2	0	1	3	3	5	2	6	18	10	11	9	4	11	29	47	43	37	48	46	49	60	49	51	47	37	47	29	34	30	57	30	42	54
Surrey Heath	0	0	0	0	0	0	0	0	0	0	0	1	0	0	0	1	0	0	1	1	1	4	2	0	1	6	4	3	2	10	5	3	6	5	12	14	3	17	7	0	11	11	8	11	12	11	4	4	18
Sutton	0	0	0	1	0	1	1	0	1	2	0	2	4	2	0	3	4	5	3	10	5	9	25	18	13	13	21	17	11	23	19	38	28	21	7	10	24	29	29	23	14	19	9	57	31	34	24	24	19
Swale	0	0	0	0	0	0	0	0	0	0	0	1	1	0	1	1	2	2	1	2	0	3	0	2	5	5	7	5	4	7	7	5	8	8	4	5	10	14	7	4	17	6	4	6	4	13	16	15	4
Swansea	0	0	0	0	0	0	0	0	0	0	2	9	3	0	1	1	1	2	4	4	2	5	9	13	10	9	16	8	12	29	17	25	27	43	39	28	45	39	53	48	42	22	42	35	28	47	43	37	26
Swindon	0	0	1	0	0	1	0	0	0	0	0	0	2	0	1	0	1	2	0	1	0	3	3	4	3	5	3	1	6	6	4	8	12	7	12	10	9	17	15	19	14	17	10	15	17	12	16	11	6
Tameside	0	0	0	0	0	1	0	0	0	1	1	4	2	2	3	2	3	3	4	2	8	4	3	5	4	8	8	7	13	10	18	15	19	13	15	14	28	10	27	14	10	8	18	20	15	17	21	12	28
Tamworth	0	0	0	0	0	0	0	0	0	0	0	0	0	0	0	0	0	1	3	4	2	3	3	2	10	3	2	1	10	3	3	6	11	6	4	4	10	4	4	2	4	5	1	2	9	4	7	1	3
Tandridge	0	0	0	0	0	1	0	0	0	0	0	0	0	1	1	0	0	1	0	4	2	4	1	4	5	6	2	2	1	3	8	4	5	9	9	3	3	9	11	10	5	4	1	7	6	12	5	3	13
Teignbridge	2	1	0	0	1	0	0	1	0	0	0	0	1	0	1	0	1	2	0	0	0	2	1	1	3	2	2	5	2	0	1	3	4	0	0	0	2	4	2	6	1	1	2	6	2	3	13	11	1
Telford and Wrekin	0	0	0	0	0	0	1	0	0	0	0	0	0	1	0	1	0	1	2	1	2	0	5	3	3	6	8	6	10	6	6	4	7	7	7	10	3	11	6	2	7	2	3	3	5	7	7	10	18
Tendring	0	0	0	0	0	0	0	0	0	0	0	0	0	0	0	0	1	0	0	4	3	3	9	1	4	7	7	1	3	1	5	8	11	10	7	5	3	7	7	6	7	8	6	10	1	13	8	7	19
Test Valley	0	0	0	0	0	0	0	0	0	0	1	4	3	2	0	0	0	0	2	3	0	3	9	4	4	5	1	1	6	7	6	4	6	5	8	6	15	10	6	2	9	2	7	13	5	6	9	2	13
Tewkesbury	0	0	0	0	0	0	0	0	1	0	0	0	1	0	2	0	2	0	1	1	2	1	0	3	5	3	3	3	4	2	1	2	5	3	3	5	4	8	9	5	14	8	4	4	2	8	7	3	4
Thanet	0	0	0	0	2	0	0	1	0	0	0	0	3	0	0	0	0	0	1	2	1	0	5	3	3	3	7	5	8	4	4	11	7	11	5	3	14	17	8	20	20	11	25	17	0	40	24	34	17
Three Rivers	0	0	0	0	0	0	0	1	0	0	0	0	2	0	1	0	1	4	3	3	0	0	7	0	10	3	6	1	2	6	9	12	9	5	3	4	10	2	5	5	9	5	5	3	5	12	10	13	3
Thurrock	0	0	0	0	0	0	0	0	0	1	1	0	0	1	0	2	3	5	1	0	3	5	9	2	4	9	12	7	7	10	10	10	19	8	10	10	8	15	19	7	7	8	5	8	5	4	11	5	6
Tonbridge and Malling	0	0	0	0	0	0	1	0	0	1	1	0	1	0	0	1	0	2	1	3	1	0	3	3	5	5	4	2	6	9	5	3	5	4	8	6	7	3	2	5	8	2	2	7	8	8	4	7	8
Torbay	0	4	0	0	0	1	2	0	0	0	0	0	0	0	1	1	1	1	0	5	1	1	2	2	1	5	6	3	1	5	7	3	2	0	4	3	2	6	3	21	5	1	2	3	3	3	1	17	4
Torfaen	0	0	0	0	0	0	0	0	0	0	0	0	2	0	1	1	2	3	8	5	2	5	14	7	9	9	8	6	9	20	7	16	13	10	10	8	22	5	12	6	8	5	0	2	8	12	11	5	5
Torridge	0	0	0	0	0	0	0	0	0	1	0	1	0	0	0	0	1	0	0	0	0	1	0	1	0	1	0	0	1	0	0	0	0	0	0	0	0	0	0	0	1	0	1	1	9	2	3	3	1
Tower Hamlets	0	0	0	2	1	1	1	1	2	2	1	5	3	3	3	3	6	10	10	11	8	4	11	18	27	34	22	12	21	16	25	24	29	36	21	19	26	19	24	19	19	14	15	17	8	14	12	3	6
Trafford	0	3	0	1	0	0	0	0	0	3	0	3	2	1	2	1	0	5	4	7	4	9	5	10	10	15	8	13	8	19	13	29	27	26	16	19	22	19	31	19	23	16	12	11	24	15	24	11	24
Tunbridge Wells	0	0	0	0	0	0	0	0	0	0	0	1	0	0	0	1	1	0	1	1	0	5	7	1	6	1	0	5	5	4	7	4	2	7	2	0	5	7	6	4	8	2	1	2	1	3	4	1	3
Uttlesford	0	0	0	0	0	0	0	0	0	0	0	0	2	2	0	1	0	0	0	1	3	0	4	2	5	1	5	4	2	3	5	3	4	3	4	2	6	3	8	4	2	3	3	2	3	6	3	2	4
Vale of Glamorgan	0	0	0	0	0	0	0	0	0	0	0	0	0	1	0	0	0	2	2	1	5	1	5	17	10	17	9	18	11	18	14	18	19	13	16	19	27	22	14	26	17	8	16	12	18	19	12	10	7
Vale of White Horse	0	0	0	0	0	2	0	0	0	0	1	0	1	0	0	1	1	1	2	1	1	1	4	5	3	7	8	6	4	5	12	3	18	7	4	5	2	9	14	9	11	4	9	9	12	8	7	6	8
Wakefield	0	0	0	0	0	0	0	0	0	0	1	4	1	0	0	0	0	4	1	2	2	5	7	7	11	14	7	13	11	11	16	17	17	28	11	21	24	23	25	13	15	8	22	17	19	31	22	16	21
Walsall	1	0	0	0	0	0	0	0	0	1	5	7	2	2	4	1	4	5	8	9	12	10	19	16	16	19	21	32	21	27	29	36	48	27	26	18	33	32	14	33	18	9	13	20	20	23	32	34	24
Waltham Forest	0	0	0	0	1	1	0	0	1	0	2	1	2	3	4	2	5	12	9	13	12	3	21	11	24	34	27	21	24	24	39	25	27	31	23	27	26	22	23	24	24	16	22	20	23	30	13	11	15
Wandsworth	1	1	1	0	0	1	0	2	2	9	10	12	4	12	12	13	20	15	17	23	16	16	27	28	44	32	30	20	23	29	41	39	38	29	28	18	35	25	26	24	29	14	11	17	23	21	20	21	12
Warrington	0	0	0	0	0	0	0	0	1	0	0	2	0	0	1	0	0	0	2	1	1	2	5	3	1	3	10	8	10	19	19	17	24	16	16	23	33	30	38	22	28	17	7	17	29	21	38	13	44
Warwick	0	0	0	0	0	0	0	0	0	0	0	0	0	0	0	2	0	2	2	2	0	2	4	2	2	8	2	6	9	12	5	11	14	7	6	6	7	8	7	9	9	8	3	7	3	8	8	5	12
Watford	0	0	0	0	0	0	0	1	0	0	0	0	1	0	0	0	0	1	0	0	3	0	8	10	11	5	7	6	9	9	13	17	13	7	9	9	15	6	14	9	14	7	7	7	12	5	8	15	8
Waverley	0	0	0	0	0	0	0	0	0	1	0	0	1	1	1	3	6	1	4	3	3	3	3	3	3	5	3	8	8	6	4	7	6	3	3	4	2	8	3	2	14	5	10	15	8	16	12	8	9
Wealden	0	0	0	0	0	0	0	0	0	0	2	1	1	0	0	0	1	2	0	3	1	1	3	3	4	5	4	1	2	5	11	5	6	3	4	4	4	10	5	9	8	4	7	6	7	12	3	7	4
Wellingborough	0	0	0	0	0	0	0	0	0	0	0	1	0	0	0	0	0	0	0	3	0	0	2	0	0	3	0	2	4	9	5	6	6	8	4	2	4	2	2	2	2	3	2	0	1	4	2	1	1
Welwyn Hatfield	0	0	0	0	0	1	0	0	0	0	0	0	0	0	1	0	2	1	3	5	2	1	5	2	1	3	2	3	6	4	1	3	8	2	3	5	7	8	5	7	3	9	3	0	5	10	5	4	1
West Berkshire	0	0	0	0	0	0	1	0	0	0	0	2	0	1	1	1	1	3	1	2	7	1	8	3	7	4	5	6	3	11	4	14	5	10	13	6	6	11	5	2	13	9	7	12	12	9	17	10	14
West Devon	0	0	1	0	0	1	0	0	0	0	0	0	1	0	0	0	0	0	0	0	0	0	0	1	3	1	2	1	0	1	1	0	1	4	2	0	2	0	1	0	0	1	2	3	1	6	2	0	4
West Lancashire	0	0	0	0	0	0	0	0	0	0	0	0	0	0	0	0	0	0	2	0	0	0	3	4	4	6	4	4	3	11	11	16	14	17	8	10	13	15	16	6	3	6	7	2	8	9	16	8	18
West Lindsey	0	0	0	0	0	0	0	0	0	0	0	1	0	0	0	0	0	1	0	0	1	0	3	2	3	1	0	1	2	3	2	1	1	2	1	2	4	2	4	0	0	2	2	1	2	7	5	3	0
West Oxfordshire	0	0	2	0	0	0	0	0	2	0	0	1	1	0	1	0	3	0	0	1	2	0	2	4	1	9	7	2	4	7	8	3	11	7	6	9	5	6	4	4	10	6	4	12	5	5	9	11	5
West Suffolk	0	0	0	0	0	0	0	0	0	0	0	0	0	0	2	1	2	0	1	1	1	1	0	3	1	2	3	0	3	4	4	2	5	4	6	4	4	3	6	2	5	1	2	1	4	3	9	6	5
Westminster	0	0	1	1	1	5	2	1	6	6	14	14	7	9	5	14	11	9	9	15	13	12	22	16	26	21	13	20	17	35	12	18	17	27	16	17	11	16	14	19	9	11	9	10	13	15	10	8	3
Wigan	0	0	2	0	1	0	0	0	0	0	0	1	0	1	1	0	1	2	0	1	4	2	3	6	6	15	13	8	14	19	24	13	24	24	14	22	23	33	27	31	24	42	23	25	30	30	53	39	70
Wiltshire	1	0	2	1	0	0	1	0	0	1	3	1	4	0	0	4	1	4	5	4	4	6	6	8	5	7	18	7	3	13	10	10	10	15	9	18	13	10	11	17	5	16	11	17	5	17	14	9	11
Winchester	0	0	0	0	0	2	0	1	2	0	3	2	0	0	3	5	2	3	5	3	2	7	5	3	6	10	5	13	7	6	3	7	8	10	8	4	5	8	9	11	4	5	9	3	2	21	10	7	10
Windsor and Maidenhead	0	0	0	0	0	1	0	0	1	2	3	5	0	3	1	2	1	0	5	5	2	7	7	2	9	5	4	8	2	11	7	9	4	4	9	4	3	10	3	10	2	9	7	2	10	12	14	10	3
Wirral	1	0	0	0	0	0	0	2	0	0	1	1	1	2	0	2	0	0	1	2	3	5	7	10	6	11	15	13	22	18	16	18	51	44	42	43	47	48	49	40	30	35	27	35	46	40	30	30	45
Woking	0	0	0	0	0	0	0	0	2	0	0	3	0	0	0	1	1	3	2	3	2	2	4	2	2	7	3	7	2	7	1	5	2	2	1	2	4	8	3	2	6	4	5	5	8	12	6	13	10
Wokingham	0	0	1	0	1	0	0	0	0	2	3	2	0	0	2	0	1	4	2	2	0	3	1	1	3	5	11	7	13	15	7	14	4	10	9	8	7	10	12	5	17	3	11	18	21	13	17	28	4
Wolverhampton	0	0	0	0	1	0	3	1	0	3	5	5	11	8	3	4	16	6	7	15	11	5	9	24	11	13	26	19	12	21	23	19	17	11	21	10	23	15	32	19	25	9	9	26	16	17	27	27	26
Worcester	0	0	0	0	0	0	0	0	1	0	0	0	0	0	2	1	1	0	0	3	1	1	5	2	0	3	7	3	1	5	2	7	8	5	1	7	5	15	9	5	5	7	2	7	8	5	9	15	17
Worthing	0	0	0	0	0	0	0	0	0	0	0	0	0	1	0	0	1	1	0	0	0	0	0	2	2	1	1	3	5	0	0	4	2	3	4	4	12	12	4	5	6	4	6	4	6	6	6	8	9
Wrexham	0	0	0	0	0	0	0	0	0	0	1	0	0	1	0	0	0	0	1	1	1	2	0	5	5	3	1	3	1	3	5	9	6	3	6	4	3	10	8	9	9	5	7	6	13	14	19	13	5
Wychavon	0	0	0	0	0	0	0	0	0	0	2	0	0	1	0	1	0	0	1	3	3	2	3	5	2	4	5	8	6	8	10	8	5	7	4	1	12	9	10	6	1	6	4	2	4	11	8	19	9
Wycombe	0	0	0	0	0	0	1	1	1	4	2	3	3	1	1	4	3	2	1	2	3	2	2	3	6	7	4	7	3	3	8	6	3	8	3	1	13	9	7	4	6	7	3	0	2	11	7	6	7
Wyre	0	0	0	0	0	0	0	0	0	0	0	1	0	0	0	1	0	1	0	0	0	0	3	4	4	1	2	3	3	4	4	3	6	8	14	7	9	9	6	13	9	9	4	6	9	7	4	7	7
Wyre Forest	0	0	0	0	0	0	0	0	1	1	1	1	0	0	0	1	1	0	5	1	1	3	2	5	7	5	3	9	5	8	9	3	4	5	7	3	4	6	4	4	8	7	8	3	8	7	6	12	12
York	0	1	0	0	0	0	0	0	0	1	0	0	1	1	0	0	2	2	2	1	1	0	1	2	1	1	5	7	0	4	6	11	11	8	4	4	10	13	10	9	6	3	5	12	7	7	10	14	6
[truncated: 268 more columns]
