# Supplementary material for: Homogeneous and heterogeneous propagation of COVID-19 from super-spreading to super-isolation
Source: Research Square preprint supplement (doi:10.21203/rs.3.rs-276177/v1), 2021-03-11
Supplement: Supplementary file 3 [file a1ba2defcc023b45395eb2e6.xlsx]

## Sheet: Sheet1
Date	Daily cases (Total)	Daily Deaths (Total)
2020-03-01	20	0
2020-03-02	37	1
2020-03-03	51	2
2020-03-04	49	0
2020-03-05	46	2
2020-03-06	69	0
2020-03-07	55	0
2020-03-08	51	3
2020-03-09	125	5
2020-03-10	233	3
2020-03-11	358	8
2020-03-12	431	12
2020-03-13	406	16
2020-03-14	326	20
2020-03-15	415	30
2020-03-16	572	42
2020-03-17	702	50
2020-03-18	922	67
2020-03-19	954	66
2020-03-20	1110	102
2020-03-21	1080	113
2020-03-22	1260	154
2020-03-23	2089	171
2020-03-24	2111	215
2020-03-25	2377	276
2020-03-26	2689	334
2020-03-27	2709	372
2020-03-28	2487	381
2020-03-29	2546	457
2020-03-30	3747	532
2020-03-31	3916	599
2020-04-01	4289	693
2020-04-02	4239	727
2020-04-03	4231	737
2020-04-04	3536	827
2020-04-05	3213	822
2020-04-06	4539	793
2020-04-07	4732	907
2020-04-08	4472	969
2020-04-09	4284	863
2020-04-10	3734	846
2020-04-11	3155	854
2020-04-12	3078	851
2020-04-13	3550	791
2020-04-14	3670	759
2020-04-15	4288	780
2020-04-16	4412	746
2020-04-17	4135	742
2020-04-18	4013	712
2020-04-19	3398	685
2020-04-20	3723	694
2020-04-21	4035	648
2020-04-22	4910	649
2020-04-23	4622	609
2020-04-24	4372	626
2020-04-25	3375	572
2020-04-26	3110	573
2020-04-27	4122	522
2020-04-28	4062	527
2020-04-29	4796	521
2020-04-30	4421	509
2020-05-01	4195	503
2020-05-02	2851	457
2020-05-03	2635	422
2020-05-04	2911	446
2020-05-05	3235	433
2020-05-06	3361	434
2020-05-07	3292	438
2020-05-08	2684	377
2020-05-09	1899	370
2020-05-10	2091	352
2020-05-11	3199	313
2020-05-12	3018	322
2020-05-13	2959	308
2020-05-14	2299	330
2020-05-15	2269	315
2020-05-16	1917	314
2020-05-17	1684	277
2020-05-18	2333	314
2020-05-19	2750	271
2020-05-20	2479	288
2020-05-21	2367	255
2020-05-22	1913	246
2020-05-23	1411	253
2020-05-24	1266	204
2020-05-25	1467	235
2020-05-26	1531	255
2020-05-27	1712	221
2020-05-28	1650	234
2020-05-29	1458	219
2020-05-30	1054	194
2020-05-31	1025	179
2020-06-01	1355	196
2020-06-02	1406	215
2020-06-03	1293	182
2020-06-04	1193	176
2020-06-05	1064	173
2020-06-06	769	157
2020-06-07	691	163
2020-06-08	1054	162
2020-06-09	1106	164
2020-06-10	1136	157
2020-06-11	971	130
2020-06-12	1009	139
2020-06-13	855	106
2020-06-14	795	142
2020-06-15	990	127
2020-06-16	1058	121
2020-06-17	958	109
2020-06-18	987	113
2020-06-19	932	99
2020-06-20	670	97
2020-06-21	615	99
2020-06-22	867	106
2020-06-23	832	132
2020-06-24	752	125
2020-06-25	686	134
2020-06-26	653	112
2020-06-27	641	91
2020-06-28	436	96
2020-06-29	696	84
2020-06-30	603	94
2020-07-01	631	79
2020-07-02	575	86
2020-07-03	548	82
2020-07-04	387	84
2020-07-05	546	72
2020-07-06	681	77
2020-07-07	577	64
2020-07-08	672	79
2020-07-09	693	97
2020-07-10	541	64
2020-07-11	420	78
2020-07-12	360	58
2020-07-13	691	76
2020-07-14	660	81
2020-07-15	732	72
2020-07-16	655	53
2020-07-17	555	73
2020-07-18	476	60
2020-07-19	416	63
2020-07-20	786	67
2020-07-21	740	62
2020-07-22	758	81
2020-07-23	747	58
2020-07-24	730	43
2020-07-25	512	56
2020-07-26	540	75
2020-07-27	821	51
2020-07-28	799	50
2020-07-29	994	58
2020-07-30	876	45
2020-07-31	636	69
2020-08-01	505	50
2020-08-02	520	53
2020-08-03	955	50
2020-08-04	937	48
2020-08-05	953	40
2020-08-06	982	56
2020-08-07	874	59
2020-08-08	637	60
2020-08-09	561	60
2020-08-10	1351	62
2020-08-11	1220	74
2020-08-12	1113	70
2020-08-13	1027	65
2020-08-14	1048	52
2020-08-15	649	75
2020-08-16	543	46
2020-08-17	1144	53
2020-08-18	948	45
2020-08-19	1093	51
2020-08-20	1228	56
2020-08-21	1010	39
2020-08-22	723	43
2020-08-23	700	51
2020-08-24	1142	41
2020-08-25	1071	58
2020-08-26	1165	56
2020-08-27	1356	45
2020-08-28	1396	47
2020-08-29	1068	43
2020-08-30	1014	35
2020-08-31	1296	62
2020-09-01	1961	54
2020-09-02	2685	44
2020-09-03	2761	51
2020-09-04	2702	58
2020-09-05	2294	70
2020-09-06	2170	52
2020-09-07	3593	51
2020-09-08	3114	57
2020-09-09	2973	51
2020-09-10	3238	41
2020-09-11	2895	40
2020-09-12	2308	57
2020-09-13	1837	55
2020-09-14	3009	59
2020-09-15	3121	70
2020-09-16	3877	62
2020-09-17	4091	63
2020-09-18	4410	66
2020-09-19	4390	58
2020-09-20	4813	70
2020-09-21	4915	68
2020-09-22	5628	79
2020-09-23	6147	92
2020-09-24	6501	73
2020-09-25	6266	68
2020-09-26	5943	70
2020-09-27	6238	94
2020-09-28	8798	96
2020-09-29	9020	74
2020-09-30	10864	94
2020-10-01	11672	106
2020-10-02	11981	105
2020-10-03	10034	104
2020-10-04	10294	87
2020-10-05	14506	104
2020-10-06	14860	104
2020-10-07	15739	119
2020-10-08	15854	111
2020-10-09	13537	110
2020-10-10	10610	120
2020-10-11	10134	142
2020-10-12	16734	131
2020-10-13	16155	133
2020-10-14	17074	137
2020-10-15	15778	160
2020-10-16	15252	162
2020-10-17	12900	201
2020-10-18	12415	150
2020-10-19	22905	195
2020-10-20	22308	225
2020-10-21	22449	248
2020-10-22	20422	232
2020-10-23	19081	240
2020-10-24	14388	224
2020-10-25	13968	239
2020-10-26	24038	260
2020-10-27	21733	261
2020-10-28	21362	273
2020-10-29	21314	292
2020-10-30	20699	329
2020-10-31	15100	323
2020-11-01	14189	320
2020-11-02	29087	320
2020-11-03	23307	338
2020-11-04	21549	319
2020-11-05	21646	364
2020-11-06	21469	375
2020-11-07	17089	390
2020-11-08	18552	389
2020-11-09	28898	475
2020-11-10	25208	366
2020-11-11	25278	366
2020-11-12	22552	406
2020-11-13	22327	399
2020-11-14	16571	420
2020-11-15	14753	428
2020-11-16	24528	406
2020-11-17	21141	432
2020-11-18	19027	503
2020-11-19	16300	449
2020-11-20	15492	456
2020-11-21	11196	464
2020-11-22	10694	484
2020-11-23	17101	464
2020-11-24	14996	465
2020-11-25	15144	504
2020-11-26	13313	447
2020-11-27	13170	434
2020-11-28	9973	451
2020-11-29	9796	471
2020-11-30	16394	456
2020-12-01	14979	433
2020-12-02	14949	421
2020-12-03	14191	495
2020-12-04	14457	490
2020-12-05	11603	426
2020-12-06	12526	427
2020-12-07	19725	459
2020-12-08	19063	466
2020-12-09	19991	449
2020-12-10	20984	472
2020-12-11	22497	500
2020-12-12	18160	479
2020-12-13	20712	469
2020-12-14	32724	508
2020-12-15	31974	476
2020-12-16	32847	454
2020-12-17	32047	551
2020-12-18	33949	548
2020-12-19	23561	520
2020-12-20	30876	528
2020-12-21	44815	629
2020-12-22	43113	628
2020-12-23	39653	607
2020-12-24	29867	594
2020-12-25	13225	634
2020-12-26	38300	683
2020-12-27	44578	683
2020-12-28	41940	692
2020-12-29	75398	690
2020-12-30	64962	741
2020-12-31	48223	752
2021-01-01	29188	742
2021-01-02	55807	767
2021-01-03	50939	738
2021-01-04	70975	874
2021-01-05	59586	913
2021-01-06	52588	915
2021-01-07	47766	992
2021-01-08	43403	957
2021-01-09	36042	995
2021-01-10	33599	1011
2021-01-11	52521	1074
